# Supplementary material
Source: publisher figshare collection journal article supplement (https://gsajournals.figshare.com/ndownloader/files/22772873)
Supplement: Supplementary file 1 [file 22772873]

## Sheet: Table S8 Legend
Table S8: Analysis of COI barcodes from Eristalini tribe of hoverflies obtained from BOLD. Entries for the Anasimyia, Eristalinus, Eristalis, Helophilus, Lejops, Mesembrius, Palpada, Parhelophilus, Phytomia, Senaspis, Mallota, and Chasmomma genera were obtained and analyzed as in Table S7.

## Sheet: Combined
	A	S	T	Total
Anasimyia	0	8	0	8
Eristalinus	0	111	0	111
Eristalis	3	470	0	473
Helophilus	0	147	336	483
Lejops	0	201	42	243
Mesembrius	0	43	0	43
Palpada	0	195	0	195
Parhelophilus	0	72	0	72
Phytomia	0	12	0	12
Senaspis	0	15	0	15
Mallota	13	30	0	43
Chasmomma	2	0	0	2
	A	S	T
Anasimyia	0	1	0
Eristalinus	0	1	0
Eristalis	0.00634249	0.993658	0
Helophilus	0	0.304348	0.695652
Lejops	0	0.82716	0.17284
Mesembrius	0	1	0
Palpada	0	1	0
Parhelophilus	0	1	0
Phytomia	0	1	0
Senaspis	0	1	0
Mallota	0.302326	0.697674	0
Chasmomma	1	0	0

## Sheet: Anasimyia BOLD Position 153
BOLD Sample	COI Position 153
GBDP1104-06|Anasimyia lineata|COI-5P|AY212785	S
JWDCI286-10|Anasimyia diffusus|COI-5P|JF877353	S
NORSY287-12|Anasimyia lineata|COI-5P	S
NORSY379-12|Anasimyia lineata|COI-5P	S
NORSY492-15|Anasimyia interpunctata|COI-5P	S
NORSY494-15|Anasimyia interpunctata|COI-5P	S
SONA232-07|Anasimyia diffusus|COI-5P	S
SONA234-07|Anasimyia diffusus|COI-5P	S

## Sheet: Eristalinus BOLD Position 153
BOLD Sample	COI Position 153
BEEEE373-16|Eristalinus sepulchralis|COI-5P	S
CGDTA037-09|Eristalinus aeneus|COI-5P	S
CGDTA038-09|Eristalinus aeneus|COI-5P	S
CGDTA047-09|Eristalinus aeneus|COI-5P	S
DIQTB337-11|Eristalinus aurulans|COI-5P	S
GBMIN61500-17|Eristalinus cf. monozonus|COI-5P|KR830882	S
GBMIN61501-17|Eristalinus eclarus|COI-5P|KR830884	S
GBMIN61502-17|Eristalinus eclarus|COI-5P|KR830889	S
GBMIN61503-17|Eristalinus eclarus|COI-5P|KR830891	S
GBMIN61504-17|Eristalinus eclarus|COI-5P|KR830894	S
GBMIN61505-17|Eristalinus eclarus|COI-5P|KR830896	S
GBMIN61506-17|Eristalinus eclarus|COI-5P|KR830886	S
GBMIN61507-17|Eristalinus eclarus|COI-5P|KR830895	S
GBMIN61508-17|Eristalinus eclarus|COI-5P|KR830892	S
GBMIN61509-17|Eristalinus eclarus|COI-5P|KR830888	S
GBMIN61510-17|Eristalinus eclarus|COI-5P|KR830898	S
GBMIN61511-17|Eristalinus eclarus|COI-5P|KR830885	S
GBMIN61512-17|Eristalinus eclarus|COI-5P|KR830890	S
GBMIN61513-17|Eristalinus eclarus|COI-5P|KR830897	S
GBMIN61514-17|Eristalinus eclarus|COI-5P|KR830893	S
GBMIN61515-17|Eristalinus flaveolus|COI-5P|KR830901	S
GBMIN61516-17|Eristalinus flaveolus|COI-5P|KR830902	S
GBMIN61517-17|Eristalinus flaveolus|COI-5P|KR830900	S
GBMIN61518-17|Eristalinus fuscicornis|COI-5P|KR830993	S
GBMIN61519-17|Eristalinus fuscicornis|COI-5P|KR830994	S
GBMIN61520-17|Eristalinus quinquelineatus|COI-5P|KR830998	S
GBMIN61521-17|Eristalinus quinquelineatus|COI-5P|KR831014	S
GBMIN61522-17|Eristalinus quinquelineatus|COI-5P|KR830996	S
GBMIN61523-17|Eristalinus quinquelineatus|COI-5P|KR831006	S
GBMIN61524-17|Eristalinus quinquelineatus|COI-5P|KR831012	S
GBMIN61525-17|Eristalinus quinquelineatus|COI-5P|KR831009	S
GBMIN61526-17|Eristalinus quinquelineatus|COI-5P|KR831002	S
GBMIN61527-17|Eristalinus quinquelineatus|COI-5P|KR831004	S
GBMIN61528-17|Eristalinus quinquelineatus|COI-5P|KR831011	S
GBMIN61529-17|Eristalinus quinquelineatus|COI-5P|KR831007	S
GBMIN61530-17|Eristalinus quinquelineatus|COI-5P|KR831010	S
GBMIN61531-17|Eristalinus quinquelineatus|COI-5P|KR830995	S
GBMIN61532-17|Eristalinus quinquelineatus|COI-5P|KR830999	S
GBMIN61533-17|Eristalinus quinquelineatus|COI-5P|KR831005	S
GBMIN61534-17|Eristalinus quinquelineatus|COI-5P|KR831008	S
GBMIN61535-17|Eristalinus smaragdinus|COI-5P|KR830917	S
GBMIN61536-17|Eristalinus smaragdinus|COI-5P|KR830916	S
GBMIN61537-17|Eristalinus smaragdinus|COI-5P|KR830920	S
GBMIN61538-17|Eristalinus smaragdinus|COI-5P|KR830914	S
GBMIN61539-17|Eristalinus smaragdinus|COI-5P|KR830918	S
GBMIN61540-17|Eristalinus smaragdinus|COI-5P|KR830913	S
GBMIN61541-17|Eristalinus smaragdinus|COI-5P|KR830919	S
GBMIN61542-17|Eristalinus smaragdinus|COI-5P|KR830905	S
GBMIN61543-17|Eristalinus smaragdinus|COI-5P|KR830907	S
GBMIN61544-17|Eristalinus smaragdinus|COI-5P|KR830903	S
GBMIN61545-17|Eristalinus smaragdinus|COI-5P|KR830909	S
GBMIN61546-17|Eristalinus smaragdinus|COI-5P|KR830908	S
GBMIN61547-17|Eristalinus smaragdinus|COI-5P|KR830904	S
GBMIN61548-17|Eristalinus smaragdinus|COI-5P|KR830910	S
GBMIN61549-17|Eristalinus smaragdinus|COI-5P|KR830906	S
GBMIN61550-17|Eristalinus smaragdinus|COI-5P|KR830912	S
GBMIN61551-17|Eristalinus sp. 1 KJ-2015|COI-5P|KR830923	S
GBMIN61552-17|Eristalinus sp. 1 KJ-2015|COI-5P|KR830927	S
GBMIN61553-17|Eristalinus sp. 1 KJ-2015|COI-5P|KR830925	S
GBMIN61554-17|Eristalinus sp. 1 KJ-2015|COI-5P|KR830924	S
GBMIN61555-17|Eristalinus surcoufi|COI-5P|KR831015	S
GBMIN61556-17|Eristalinus tabanoides|COI-5P|KR830936	S
GBMIN61557-17|Eristalinus tabanoides|COI-5P|KR830928	S
GBMIN61558-17|Eristalinus tabanoides|COI-5P|KR830935	S
GBMIN61559-17|Eristalinus tabanoides|COI-5P|KR830940	S
GBMIN61560-17|Eristalinus tabanoides|COI-5P|KR830929	S
GBMIN61561-17|Eristalinus tabanoides|COI-5P|KR830930	S
GBMIN61562-17|Eristalinus tabanoides|COI-5P|KR830938	S
GBMIN61563-17|Eristalinus tabanoides|COI-5P|KR830942	S
GBMIN61564-17|Eristalinus tabanoides|COI-5P|KR830945	S
GBMIN61565-17|Eristalinus tabanoides|COI-5P|KR830946	S
GBMIN61566-17|Eristalinus tabanoides|COI-5P|KR830932	S
GBMIN61567-17|Eristalinus tabanoides|COI-5P|KR830939	S
GBMIN61568-17|Eristalinus tabanoides|COI-5P|KR830947	S
GBMIN61569-17|Eristalinus tabanoides|COI-5P|KR830944	S
GBMIN61570-17|Eristalinus tabanoides|COI-5P|KR830951	S
GBMIN61571-17|Eristalinus tabanoides|COI-5P|KR830931	S
GBMIN61572-17|Eristalinus tabanoides|COI-5P|KR830941	S
GBMIN61573-17|Eristalinus tabanoides|COI-5P|KR830948	S
GBMIN61574-17|Eristalinus vicarians|COI-5P|KR830973	S
GBMIN61575-17|Eristalinus vicarians|COI-5P|KR830971	S
GBMIN61576-17|Eristalinus vicarians|COI-5P|KR830961	S
GBMIN61577-17|Eristalinus vicarians|COI-5P|KR830979	S
GBMIN61578-17|Eristalinus vicarians|COI-5P|KR830981	S
GBMIN61579-17|Eristalinus vicarians|COI-5P|KR830982	S
GBMIN61580-17|Eristalinus vicarians|COI-5P|KR830956	S
GBMIN61581-17|Eristalinus vicarians|COI-5P|KR830962	S
GBMIN61582-17|Eristalinus vicarians|COI-5P|KR830970	S
GBMIN61583-17|Eristalinus vicarians|COI-5P|KR830972	S
GBMIN61584-17|Eristalinus vicarians|COI-5P|KR830964	S
GBMIN61585-17|Eristalinus vicarians|COI-5P|KR830953	S
GBMIN61586-17|Eristalinus vicarians|COI-5P|KR830974	S
GBMIN61587-17|Eristalinus vicarians|COI-5P|KR830959	S
GBMIN61588-17|Eristalinus vicarians|COI-5P|KR830976	S
GBMIN61589-17|Eristalinus vicarians|COI-5P|KR830966	S
GBMIN61590-17|Eristalinus vicarians|COI-5P|KR830978	S
GBMIN61591-17|Eristalinus vicarians|COI-5P|KR830952	S
GBMIN61592-17|Eristalinus vicarians|COI-5P|KR830954	S
GBMIN61593-17|Eristalinus vicarians|COI-5P|KR830957	S
GBMIN61594-17|Eristalinus vicarians|COI-5P|KR830963	S
GBMIN61595-17|Eristalinus vicarians|COI-5P|KR830955	S
GBMIN61596-17|Eristalinus vicarians|COI-5P|KR830969	S
GBMIN61597-17|Eristalinus vicarians|COI-5P|KR830965	S
GBSYR105-14|Eristalinus sp.|COI-5P|AB907187	S
GMEGK024-14|Eristalinus aeneus|COI-5P	S
GMESB727-14|Eristalinus aeneus|COI-5P	S
NORSY313-12|Eristalinus aeneus|COI-5P	S
NORSY314-12|Eristalinus sepulchralis|COI-5P	S
NORSY397-12|Eristalinus sepulchralis|COI-5P	S
SPGUT016-16|Eristalinus sepulchralis|COI-5P	S
SPGUT069-16|Eristalinus sepulchralis|COI-5P	S

## Sheet: Eristalis BOLD Position 153
BOLD Sample	COI Position 153
GBDP4205-07|Eristalis cerealis|COI-5P|DQ316070	A
GBMIN61598-17|Eristalis apis|COI-5P|KR830984	A
GBMIN61599-17|Eristalis apis|COI-5P|KR830983	A
ASIND1818-12|Eristalis gatesi|COI-5P	S
ASIND1819-12|Eristalis gatesi|COI-5P	S
ASIND1821-12|Eristalis gatesi|COI-5P	S
ASIND1822-12|Eristalis gatesi|COI-5P	S
ASIND1823-12|Eristalis gatesi|COI-5P	S
ASIND1824-12|Eristalis gatesi|COI-5P	S
BBDCP788-10|Eristalis tenax|COI-5P|JF869144	S
BBDCP789-10|Eristalis tenax|COI-5P|JF869145	S
BBDCP790-10|Eristalis tenax|COI-5P|JF869146	S
BBDCP791-10|Eristalis tenax|COI-5P|JF869147	S
BBDCP792-10|Eristalis tenax|COI-5P|JF869148	S
BBDCP793-10|Eristalis anthophorina|COI-5P|JF869149	S
BBDCP794-10|Eristalis anthophorina|COI-5P|JF869150	S
BBDCP795-10|Eristalis anthophorina|COI-5P|JF869151	S
BBDCP796-10|Eristalis obscura|COI-5P|JF869152	S
BBDCP816-10|Eristalis rupium|COI-5P|JF869172	S
BBDCP817-10|Eristalis hirta|COI-5P|JF869173	S
BBDCP818-10|Eristalis dimidiata|COI-5P|JF869174	S
BBDCP819-10|Eristalis dimidiata|COI-5P|JF869175	S
BBDCP820-10|Eristalis dimidiata|COI-5P|JF869176	S
BBDCP821-10|Eristalis dimidiata|COI-5P|JF869177	S
BBDCP822-10|Eristalis dimidiata|COI-5P|JF869178	S
BBDCQ904-10|Eristalis transversa|COI-5P|JN291670	S
BBDEC038-09|Eristalis transversa|COI-5P|GU689812	S
BBDEC046-09|Eristalis flavipes|COI-5P|GU689813	S
BBDEC047-09|Eristalis flavipes|COI-5P|GU689814	S
BBDEC203-09|Eristalis dimidiata|COI-5P|GU690018	S
BBDEC204-09|Eristalis dimidiata|COI-5P|GU690019	S
BBDEC205-09|Eristalis cryptarum|COI-5P|GU690012	S
BBDEC207-09|Eristalis dimidiata|COI-5P|GU690021	S
BBDEC208-09|Eristalis cryptarum|COI-5P|GU690017	S
BBDEC209-09|Eristalis dimidiata|COI-5P|GU690020	S
BBDEC210-09|Eristalis cryptarum|COI-5P|GU690013	S
BBDEC211-09|Eristalis cryptarum|COI-5P|GU690014	S
BBDEC213-09|Eristalis cryptarum|COI-5P|GU690015	S
BBDED111-10|Eristalis cryptarum|COI-5P|HM883082	S
BBDIT253-11|Eristalis stipator|COI-5P	S
BBDIT254-11|Eristalis stipator|COI-5P	S
BBDIT255-11|Eristalis stipator|COI-5P	S
BBDIT262-11|Eristalis stipator|COI-5P	S
BEEEE363-16|Eristalis arbustorum|COI-5P	S
BEEEE367-16|Eristalis horticola|COI-5P	S
BEEEE368-16|Eristalis intricarius|COI-5P	S
BEEEE371-16|Eristalis nemorum|COI-5P	S
BEEEE372-16|Eristalis pertinax|COI-5P	S
BEEEE375-16|Eristalis tenax|COI-5P	S
BEEEE376-16|Eristalis tenax|COI-5P	S
BEEEE377-16|Eristalis tenax|COI-5P	S
CGDTA026-09|Eristalis tenax|COI-5P	S
CGDTA027-09|Eristalis tenax|COI-5P	S
CGDTA029-09|Eristalis tenax|COI-5P	S
CGDTA032-09|Eristalis arbustorum|COI-5P	S
CGDTA033-09|Eristalis arbustorum|COI-5P	S
CGDTA036-09|Eristalis arbustorum|COI-5P	S
CGDTA039-09|Eristalis arbustorum|COI-5P	S
CNBAK462-13|Eristalis arbustorum|COI-5P|KR437244	S
CNCDB669-11|Eristalis arbustorum|COI-5P|JN991982	S
CNCDB677-11|Eristalis cryptarum|COI-5P|JN991983	S
CNCDB719-11|Eristalis transversa|COI-5P|JN991986	S
CNCDB731-11|Eristalis tenax|COI-5P|JN991985	S
CNCFF016-16|Eristalis tenax|COI-5P|MK073138	S
CNFNP198-14|Eristalis dimidiata|COI-5P|KR387838	S
CNFNP2403-14|Eristalis dimidiata|COI-5P|KR386367	S
CNGBH790-14|Eristalis dimidiata|COI-5P|KR398524	S
CNPKD990-13|Eristalis dimidiata|COI-5P|KR394256	S
CNPKE627-14|Eristalis dimidiata|COI-5P|KR382013	S
CNPKE648-14|Eristalis dimidiata|COI-5P|KR389935	S
CNPKL089-14|Eristalis dimidiata|COI-5P|KR384971	S
CNPKL090-14|Eristalis dimidiata|COI-5P|KR383956	S
CNPKL092-14|Eristalis dimidiata|COI-5P|KR395711	S
CNPKL097-14|Eristalis dimidiata|COI-5P|KR381971	S
CNPKL336-14|Eristalis dimidiata|COI-5P|KR389951	S
CNPKL342-14|Eristalis dimidiata|COI-5P|KR392672	S
CNPKL343-14|Eristalis dimidiata|COI-5P|KR399323	S
CNPKL432-14|Eristalis dimidiata|COI-5P|KR387543	S
CNPKL734-14|Eristalis dimidiata|COI-5P|KR386689	S
CNPKL765-14|Eristalis dimidiata|COI-5P|KR398546	S
CNPKO3441-14|Eristalis dimidiata|COI-5P|KR397818	S
CNRGR072-15|Eristalis transversa|COI-5P|MF832135	S
CNRMC896-12|Eristalis obscura|COI-5P|KP046956	S
CNRMD2017-12|Eristalis obscura|COI-5P|KP038015	S
CNRMF3791-12|Eristalis dimidiata|COI-5P|KP043804	S
CNTIF2601-15|Eristalis anthophorina|COI-5P|MF832109	S
CNWBD311-13|Eristalis flavipes|COI-5P|KP045248	S
CRHIH001-16|Eristalis dimidiata|COI-5P|MG163486	S
DPAS1028-11|Eristalis tenax|COI-5P	S
DRYAS10457-15|Eristalis fraterculus|COI-5P	S
DRYAS14860-15|Eristalis anthophorina|COI-5P	S
GBDP1208-06|Eristalis tenax|COI-5P|AY261703	S
GBMIN61600-17|Eristalis plumipes|COI-5P|KR830989	S
GBMIN61601-17|Eristalis plumipes|COI-5P|KR830991	S
GBMIN61602-17|Eristalis plumipes|COI-5P|KR830987	S
GBMIN61603-17|Eristalis plumipes|COI-5P|KR830986	S
GBMIN61604-17|Eristalis sp. SMH-2016|COI-5P|KT175588	S
GBSYR028-10|Eristalis tenax|COI-5P|EU431482	S
GMGMA305-14|Eristalis tenax|COI-5P	S
GMGMA306-14|Eristalis sp. BOLDAAE4458|COI-5P	S
GMGMA312-14|Eristalis sp. BOLDAAA8223|COI-5P	S
GMGMA319-14|Eristalis tenax|COI-5P	S
GMGMA321-14|Eristalis sp. BOLDAAE4458|COI-5P	S
GMGMA333-14|Eristalis tenax|COI-5P	S
GMGMA348-14|Eristalis tenax|COI-5P	S
GMGMA365-14|Eristalis sp. BOLDAAE4458|COI-5P	S
GMGMA367-14|Eristalis sp. BOLDAAE4458|COI-5P	S
GMGMA390-14|Eristalis tenax|COI-5P	S
GMGMB593-14|Eristalis tenax|COI-5P	S
GMGMC046-14|Eristalis sp. BOLDABU6609|COI-5P	S
GMGMC049-14|Eristalis tenax|COI-5P	S
GMGMC051-14|Eristalis tenax|COI-5P	S
GMGMC053-14|Eristalis tenax|COI-5P	S
GMGMC055-14|Eristalis pertinax|COI-5P	S
GMGMC056-14|Eristalis sp. BOLDAAE4458|COI-5P	S
GMGMC072-14|Eristalis sp. BOLDAAA8223|COI-5P	S
GMGMC073-14|Eristalis sp. BOLDAAE4458|COI-5P	S
GMGMC074-14|Eristalis sp. BOLDAAE4458|COI-5P	S
GMGMC252-14|Eristalis sp. BOLDAAE4458|COI-5P	S
GMGMC253-14|Eristalis sp. BOLDAAE4458|COI-5P	S
GMGMC254-14|Eristalis sp. BOLDAAE4458|COI-5P	S
GMGMD074-14|Eristalis sp. BOLDAAA8223|COI-5P	S
GMGMD223-14|Eristalis similis|COI-5P	S
GMGME151-14|Eristalis tenax|COI-5P	S
GMGMH1398-14|Eristalis pertinax|COI-5P	S
GMGMI103-14|Eristalis pertinax|COI-5P	S
GMGMI109-14|Eristalis pertinax|COI-5P	S
GMGMI111-14|Eristalis pertinax|COI-5P	S
GMGMI117-14|Eristalis pertinax|COI-5P	S
GMGMI118-14|Eristalis pertinax|COI-5P	S
GMGMI122-14|Eristalis pertinax|COI-5P	S
GMGMI130-14|Eristalis pertinax|COI-5P	S
GMGMI164-14|Eristalis pertinax|COI-5P	S
GMGMJ243-14|Eristalis pertinax|COI-5P	S
GMGMK313-14|Eristalis tenax|COI-5P	S
GMGMM199-14|Eristalis tenax|COI-5P	S
GMGMM260-14|Eristalis pertinax|COI-5P	S
GMGMN237-14|Eristalis pertinax|COI-5P	S
GMGMN319-14|Eristalis pertinax|COI-5P	S
ICHC007-08|Eristalis transversa|COI-5P	S
ICHC008-08|Eristalis dimidiata|COI-5P	S
JMFLY068-13|Eristalis tenax|COI-5P	S
JMFLY089-13|Eristalis hirta|COI-5P	S
JSDIQ320-10|Eristalis transversa|COI-5P|JF873742	S
JSFLA001-08|Eristalis flavipes|COI-5P|KR653472	S
JSFLA016-08|Eristalis dimidiata|COI-5P|KR673020	S
JSFLA018-08|Eristalis dimidiata|COI-5P|KR671456	S
JSFLA027-08|Eristalis fraterculus|COI-5P|KR660722	S
JWDCF332-10|Eristalis brousii|COI-5P|JF875156	S
JWDCG483-10|Eristalis dimidiata|COI-5P|JF876066	S
JWDCG484-10|Eristalis cryptarum|COI-5P|JF876067	S
JWDCG567-10|Eristalis dimidiata|COI-5P|JF876133	S
JWDCG568-10|Eristalis dimidiata|COI-5P|JF876134	S
JWDCG569-10|Eristalis dimidiata|COI-5P|JF876135	S
JWDCH120-10|Eristalis anthophorina|COI-5P|JF876504	S
JWDCH673-10|Eristalis anthophorina|COI-5P|JF876892	S
LASPA014-16|Eristalis anthophorina|COI-5P|MG168665	S
LASPA015-16|Eristalis hirta|COI-5P|MG165868	S
LASPA016-16|Eristalis hirta|COI-5P|MG165018	S
LASPA018-16|Eristalis anthophorina|COI-5P|MG163305	S
LASPA022-16|Eristalis obscura|COI-5P|MG165544	S
LASPA023-16|Eristalis tenax|COI-5P|MG163635	S
LASPA024-16|Eristalis tenax|COI-5P|MG168865	S
LASPA025-16|Eristalis tenax|COI-5P|MG170925	S
LASPA026-16|Eristalis obscura|COI-5P|MG166884	S
LASPA063-16|Eristalis flavipes|COI-5P|MG165879	S
LRSYR019-07|Eristalis obscura|COI-5P|KR660014	S
LRSYR020-07|Eristalis obscura|COI-5P|KR664937	S
LRSYR025-07|Eristalis brousii|COI-5P|KR660672	S
LRSYR028-07|Eristalis obscura|COI-5P|KR659548	S
LRSYR040-07|Eristalis brousii|COI-5P|KR658881	S
LRSYR049-07|Eristalis fraterculus|COI-5P|KR665095	S
LRSYR050-07|Eristalis anthophorina|COI-5P|KR663548	S
LRSYR051-07|Eristalis dimidiata|COI-5P|KR653420	S
LRSYR052-07|Eristalis obscura|COI-5P|KR670194	S
MHSYR024-06|Eristalis brousii|COI-5P	S
MHSYR026-06|Eristalis tenax|COI-5P	S
MHSYR027-06|Eristalis dimidiata|COI-5P	S
MHSYR054-07|Eristalis tenax|COI-5P	S
MHSYR062-07|Eristalis anthophorina|COI-5P	S
MHSYR066-07|Eristalis anthophorina|COI-5P	S
MHSYR072-07|Eristalis anthophorina|COI-5P	S
MHSYR077-07|Eristalis tenax|COI-5P	S
MHSYR093-07|Eristalis tenax|COI-5P	S
MHSYR137-07|Eristalis anthophorina|COI-5P	S
MHSYR138-07|Eristalis anthophorina|COI-5P	S
MHSYR140-07|Eristalis flavipes|COI-5P	S
MHSYR142-07|Eristalis obscura|COI-5P	S
MHSYR143-07|Eristalis dimidiata|COI-5P	S
MHSYR144-07|Eristalis obscura|COI-5P	S
MHSYR146-07|Eristalis dimidiata|COI-5P	S
MHSYR180-07|Eristalis obscura|COI-5P	S
MHSYR185-07|Eristalis obscura|COI-5P	S
MHSYR186-07|Eristalis obscura|COI-5P	S
MHSYR191-07|Eristalis anthophorina|COI-5P	S
MHSYR217-07|Eristalis brousii|COI-5P|KR686948	S
MHSYR218-07|Eristalis dimidiata|COI-5P	S
MHSYR322-07|Eristalis fraterculus|COI-5P	S
MHSYR329-07|Eristalis dimidiata|COI-5P	S
MHSYR330-07|Eristalis fraterculus|COI-5P	S
MHSYR332-07|Eristalis brousii|COI-5P	S
MHSYR334-07|Eristalis brousii|COI-5P	S
MHSYR335-07|Eristalis brousii|COI-5P	S
MHSYR337-07|Eristalis brousii|COI-5P	S
MHSYR338-07|Eristalis brousii|COI-5P	S
MHSYR339-07|Eristalis brousii|COI-5P	S
MHSYR341-07|Eristalis brousii|COI-5P	S
MHSYR351-07|Eristalis obscura|COI-5P	S
MHSYR352-07|Eristalis obscura|COI-5P	S
MHSYR353-07|Eristalis obscura|COI-5P	S
MHSYR358-07|Eristalis obscura|COI-5P	S
MHSYR359-07|Eristalis obscura|COI-5P	S
MHSYR360-07|Eristalis obscura|COI-5P	S
MHSYR362-07|Eristalis obscura|COI-5P	S
MHSYR363-07|Eristalis obscura|COI-5P	S
MHSYR364-07|Eristalis obscura|COI-5P	S
MHSYR365-07|Eristalis obscura|COI-5P	S
MHSYR366-07|Eristalis obscura|COI-5P	S
MHSYR368-07|Eristalis obscura|COI-5P	S
MHSYR369-07|Eristalis obscura|COI-5P	S
MHSYR370-07|Eristalis obscura|COI-5P	S
MHSYR371-07|Eristalis obscura|COI-5P	S
MHSYR372-07|Eristalis obscura|COI-5P	S
MHSYR373-07|Eristalis obscura|COI-5P	S
MHSYR374-07|Eristalis obscura|COI-5P	S
MHSYR376-07|Eristalis obscura|COI-5P	S
MHSYR377-07|Eristalis obscura|COI-5P	S
MHSYR379-07|Eristalis obscura|COI-5P	S
MHSYR381-07|Eristalis obscura|COI-5P	S
MHSYR382-07|Eristalis obscura|COI-5P	S
MHSYR383-07|Eristalis obscura|COI-5P	S
MHSYR384-07|Eristalis obscura|COI-5P	S
MHSYR385-07|Eristalis obscura|COI-5P	S
MHSYR386-07|Eristalis obscura|COI-5P	S
MHSYR387-07|Eristalis obscura|COI-5P	S
MHSYR388-07|Eristalis obscura|COI-5P	S
MHSYR389-07|Eristalis obscura|COI-5P	S
MHSYR391-07|Eristalis obscura|COI-5P	S
MHSYR393-07|Eristalis obscura|COI-5P	S
MHSYR394-07|Eristalis obscura|COI-5P	S
MHSYR396-07|Eristalis brousii|COI-5P	S
MHSYR397-07|Eristalis brousii|COI-5P	S
MHSYR398-07|Eristalis brousii|COI-5P	S
MHSYR399-07|Eristalis brousii|COI-5P	S
MHSYR400-07|Eristalis brousii|COI-5P	S
MHSYR401-07|Eristalis brousii|COI-5P	S
MHSYR402-07|Eristalis brousii|COI-5P	S
MHSYR403-07|Eristalis brousii|COI-5P	S
MHSYR404-07|Eristalis obscura|COI-5P	S
MHSYR406-07|Eristalis brousii|COI-5P	S
MHSYR407-07|Eristalis brousii|COI-5P	S
MHSYR408-07|Eristalis obscura|COI-5P	S
MHSYR409-07|Eristalis brousii|COI-5P	S
MHSYR410-07|Eristalis brousii|COI-5P	S
NCCA2519-11|Eristalis dimidiata|COI-5P|KR689483	S
NCCA2520-11|Eristalis dimidiata|COI-5P|KR688965	S
NCCA2521-11|Eristalis dimidiata|COI-5P|KR687300	S
NCCA2522-11|Eristalis dimidiata|COI-5P|KR696452	S
NCCA2523-11|Eristalis tenax|COI-5P|KR694524	S
NCCA2524-11|Eristalis tenax|COI-5P|KR690658	S
NGNAX2158-14|Eristalis tenax|COI-5P|KT104205	S
NGNAY2865-14|Eristalis arbustorum|COI-5P|KT111689	S
NORSY028-12|Eristalis interrupta|COI-5P	S
NORSY084-12|Eristalis arbustorum|COI-5P	S
NORSY093-12|Eristalis interrupta|COI-5P	S
NORSY094-12|Eristalis tenax|COI-5P	S
NORSY102-12|Eristalis intricaria|COI-5P	S
NORSY130-12|Eristalis intricaria|COI-5P	S
NORSY149-12|Eristalis arbustorum|COI-5P	S
NORSY173-12|Eristalis pertinax|COI-5P	S
NORSY175-12|Eristalis rupium|COI-5P	S
NORSY176-12|Eristalis rupium|COI-5P	S
NORSY225-12|Eristalis interrupta|COI-5P	S
NORSY276-12|Eristalis tenax|COI-5P	S
NORSY285-12|Eristalis arbustorum|COI-5P	S
NORSY315-12|Eristalis abusiva|COI-5P	S
NORSY316-12|Eristalis cryptarum|COI-5P	S
NORSY317-12|Eristalis lineata|COI-5P	S
NORSY318-12|Eristalis obscura|COI-5P	S
NORSY319-12|Eristalis obscura|COI-5P	S
NORSY351-12|Eristalis pertinax|COI-5P	S
NORSY378-12|Eristalis tenax|COI-5P	S
NORSY380-12|Eristalis abusiva|COI-5P	S
NORSY486-15|Eristalis hirta|COI-5P	S
NORSY487-15|Eristalis anthophorina|COI-5P	S
NORSY488-15|Eristalis similis|COI-5P	S
NORSY489-15|Eristalis similis|COI-5P	S
OPPEI4082-17|Eristalis dimidiata|COI-5P	S
OPPQI083-17|Eristalis dimidiata|COI-5P	S
OPPQQ063-17|Eristalis transversa|COI-5P	S
OPPQQ065-17|Eristalis transversa|COI-5P	S
RBINA1967-13|Eristalis dimidiata|COI-5P|KR749079	S
RBINA4323-13|Eristalis transversa|COI-5P|KR738877	S
RBINA4324-13|Eristalis dimidiata|COI-5P|KR752142	S
RBINA5051-13|Eristalis dimidiata|COI-5P|KR740233	S
RBINA5386-13|Eristalis dimidiata|COI-5P|KR744611	S
RBINA5410-13|Eristalis tenax|COI-5P|KR754945	S
RBINA944-13|Eristalis dimidiata|COI-5P|KR743326	S
RBINA945-13|Eristalis dimidiata|COI-5P|KR753197	S
RBINA946-13|Eristalis dimidiata|COI-5P|KR755801	S
SMTPD5156-13|Eristalis dimidiata|COI-5P|KR766276	S
SMTPF4900-14|Eristalis dimidiata|COI-5P|KR764409	S
SMTPJ536-14|Eristalis tenax|COI-5P|KR719186	S
SMTPL7375-15|Eristalis anthophorina|COI-5P|MG167697	S
SMTPM656-15|Eristalis dimidiata|COI-5P|MG165641	S
SMTPM657-15|Eristalis dimidiata|COI-5P|MG165287	S
SMTPO4031-15|Eristalis transversa|COI-5P|MG163291	S
SMTPO4032-15|Eristalis transversa|COI-5P|MG168526	S
SMTPO4675-15|Eristalis dimidiata|COI-5P|MG170739	S
SONA062-06|Eristalis dimidiata|COI-5P	S
SONA063-06|Eristalis hirta|COI-5P	S
SONA064-06|Eristalis hirta|COI-5P	S
SONA065-06|Eristalis obscura|COI-5P	S
SONA066-06|Eristalis interrupta|COI-5P|JN991984	S
SONA067-06|Eristalis stipator|COI-5P	S
SONA068-06|Eristalis stipator|COI-5P	S
SONA069-06|Eristalis stipator|COI-5P	S
SONA070-06|Eristalis stipator|COI-5P	S
SONA071-06|Eristalis tenax|COI-5P	S
SONA072-06|Eristalis anthophorina|COI-5P	S
SONA073-06|Eristalis anthophorina|COI-5P	S
SONA075-06|Eristalis anthophorina|COI-5P	S
SONA076-06|Eristalis anthophorina|COI-5P	S
SONA077-06|Eristalis arbustorum|COI-5P	S
SONA080-06|Eristalis arbustorum|COI-5P	S
SONA083-06|Eristalis obscura|COI-5P	S
SONA084-06|Eristalis cryptarum|COI-5P	S
SONA085-06|Eristalis cryptarum|COI-5P	S
SONA086-06|Eristalis dimidiata|COI-5P	S
SONA087-06|Eristalis dimidiata|COI-5P	S
SONA089-06|Eristalis hirta|COI-5P	S
SONA090-06|Eristalis arbustorum|COI-5P	S
SONA091-06|Eristalis interrupta|COI-5P	S
SONA092-06|Eristalis sp. nov.|COI-5P	S
SONA095-06|Eristalis sp. nov.|COI-5P	S
SONA096-06|Eristalis sp. nov.|COI-5P	S
SONA097-06|Eristalis rupium|COI-5P	S
SONA098-06|Eristalis rupium|COI-5P	S
SONA100-06|Eristalis saxorum|COI-5P	S
SONA101-06|Eristalis transversa|COI-5P	S
SONA102-06|Eristalis transversa|COI-5P	S
SONA103-06|Eristalis transversa|COI-5P	S
SONA104-06|Eristalis tenax|COI-5P	S
SONA105-06|Eristalis tenax|COI-5P	S
SONA106-06|Eristalis tenax|COI-5P	S
SONA107-06|Eristalis tenax|COI-5P|KC900459	S
SONA188-06|Eristalis brousii|COI-5P	S
SONA189-07|Eristalis obscura|COI-5P	S
SONA194-07|Eristalis brousii|COI-5P	S
SONA195-07|Eristalis brousii|COI-5P	S
SONA196-07|Eristalis obscura|COI-5P	S
SONA197-07|Eristalis cryptarum|COI-5P	S
SONA198-07|Eristalis cryptarum|COI-5P	S
SONA199-07|Eristalis flavipes|COI-5P	S
SONA200-07|Eristalis flavipes|COI-5P	S
SONA201-07|Eristalis flavipes|COI-5P	S
SONA202-07|Eristalis flavipes|COI-5P	S
SONA205-07|Eristalis fraterculus|COI-5P	S
SONA208-07|Eristalis fraterculus|COI-5P	S
SONA211-07|Eristalis hirta|COI-5P	S
SONA212-07|Eristalis hirta|COI-5P	S
SONA214-07|Eristalis obscura|COI-5P	S
SONA215-07|Eristalis obscura|COI-5P	S
SONA216-07|Eristalis rupium|COI-5P	S
SONA217-07|Eristalis rupium|COI-5P	S
SONA363-09|Eristalis arbustorum|COI-5P	S
SONA364-09|Eristalis arbustorum|COI-5P	S
SONA371-09|Eristalis arbustorum|COI-5P	S
SONA372-09|Eristalis arbustorum|COI-5P	S
SONA373-09|Eristalis arbustorum|COI-5P	S
SONA374-09|Eristalis arbustorum|COI-5P	S
SONA375-09|Eristalis arbustorum|COI-5P	S
SONA376-09|Eristalis arbustorum|COI-5P	S
SONA377-09|Eristalis arbustorum|COI-5P	S
SONA378-09|Eristalis arbustorum|COI-5P	S
SONA379-09|Eristalis arbustorum|COI-5P	S
SONA380-09|Eristalis arbustorum|COI-5P	S
SONA381-09|Eristalis arbustorum|COI-5P	S
SONA382-09|Eristalis arbustorum|COI-5P	S
SONA383-09|Eristalis arbustorum|COI-5P	S
SONA384-09|Eristalis arbustorum|COI-5P	S
SONA385-09|Eristalis arbustorum|COI-5P	S
SONA386-09|Eristalis arbustorum|COI-5P	S
SONA387-09|Eristalis arbustorum|COI-5P	S
SONA388-09|Eristalis arbustorum|COI-5P	S
SONA389-09|Eristalis arbustorum|COI-5P	S
SONA390-09|Eristalis arbustorum|COI-5P|KC900447	S
SONA391-09|Eristalis brousii|COI-5P	S
SONA392-09|Eristalis brousii|COI-5P	S
SONA393-09|Eristalis brousii|COI-5P	S
SONA396-09|Eristalis brousii|COI-5P	S
SONA397-09|Eristalis brousii|COI-5P	S
SONA398-09|Eristalis brousii|COI-5P	S
SONA399-09|Eristalis brousii|COI-5P	S
SONA400-09|Eristalis brousii|COI-5P	S
SONA401-09|Eristalis brousii|COI-5P	S
SONA402-09|Eristalis brousii|COI-5P	S
SONA433-09|Eristalis dimidiata|COI-5P	S
SONA437-09|Eristalis arbustorum|COI-5P	S
SONA438-09|Eristalis arbustorum|COI-5P	S
SONA439-09|Eristalis arbustorum|COI-5P	S
SONA440-09|Eristalis arbustorum|COI-5P	S
SONA441-09|Eristalis arbustorum|COI-5P	S
SONA442-09|Eristalis arbustorum|COI-5P	S
SSBCA1246-15|Eristalis cryptarum|COI-5P|MG166422	S
SSGBB930-14|Eristalis cryptarum|COI-5P|KR520344	S
SSGIB1638-15|Eristalis anthophorina|COI-5P|MF832685	S
SSGIB1639-15|Eristalis anthophorina|COI-5P|MF829777	S
SSGIC3373-15|Eristalis anthophorina|COI-5P|MF838545	S
SSGIC3375-15|Eristalis anthophorina|COI-5P|MF833190	S
SSGIC4877-15|Eristalis anthophorina|COI-5P|MF836341	S
SSJAB3424-13|Eristalis tenax|COI-5P|KM956033	S
SSJAE6443-13|Eristalis obscura|COI-5P|KM907936	S
SSKJC2161-15|Eristalis obscura|COI-5P|KR980205	S
SSKUB12503-15|Eristalis anthophorina|COI-5P|MF833502	S
SSPAB9676-13|Eristalis obscura|COI-5P|KM631232	S
SYROC478-15|Eristalis tenax|COI-5P|MK074710	S
TTDBW123-08|Eristalis obscura|COI-5P|KR514746	S
TTDBW168-08|Eristalis tenax|COI-5P|KR522405	S
TTDBW171-08|Eristalis dimidiata|COI-5P|KR522139	S
TTDBW201-09|Eristalis tenax|COI-5P|KR521110	S
TTDBW202-09|Eristalis tenax|COI-5P|HQ981250	S
TTDBW203-09|Eristalis tenax|COI-5P|KR521654	S
TTDBW204-09|Eristalis transversa|COI-5P|HQ981251	S
TTDBW219-09|Eristalis tenax|COI-5P|KR520640	S
TTDBW222-09|Eristalis transversa|COI-5P|KR517201	S
TTDBW223-09|Eristalis transversa|COI-5P|KR519176	S
TTDBW258-09|Eristalis anthophorina|COI-5P|KR522596	S
TTDBW259-09|Eristalis anthophorina|COI-5P|KR524226	S
TTDBW265-09|Eristalis tenax|COI-5P|KR525319	S
TTDBW266-09|Eristalis dimidiata|COI-5P|KR522663	S
TTDFW054-08|Eristalis flavipes|COI-5P|KM570740	S
TTDFW060-08|Eristalis flavipes|COI-5P|KM571727	S
TTDFW064-08|Eristalis obscura|COI-5P|KM571553	S
TTDFW065-08|Eristalis obscura|COI-5P|KM569797	S
TTDFW210-08|Eristalis dimidiata|COI-5P|KM570041	S
TTDFW218-08|Eristalis rupium|COI-5P|KM570940	S
TTDFW397-08|Eristalis anthophorina|COI-5P|KM570124	S
TTDFW404-08|Eristalis anthophorina|COI-5P|KM569802	S
TTDFW476-08|Eristalis flavipes|COI-5P|KM571676	S
TTDFW496-08|Eristalis flavipes|COI-5P|KM570163	S
TTDFW498-08|Eristalis tenax|COI-5P|KM570715	S
TTDFW499-08|Eristalis tenax|COI-5P|KM569705	S
TTDFW507-08|Eristalis hirta|COI-5P|KM570879	S
TTDFW553-08|Eristalis anthophorina|COI-5P|KM571222	S
TTDFW639-08|Eristalis dimidiata|COI-5P|KM571129	S
TTDFW706-08|Eristalis dimidiata|COI-5P|KM570460	S
TTDFW714-08|Eristalis flavipes|COI-5P|KM571546	S
TTDFW734-08|Eristalis dimidiata|COI-5P|KM570629	S
TTDFW735-08|Eristalis dimidiata|COI-5P|KM570273	S
TTDFW737-08|Eristalis stipator|COI-5P|KM571264	S
TTDFW738-08|Eristalis dimidiata|COI-5P|KM569798	S
TTDFW856-08|Eristalis tenax|COI-5P|KM571456	S
TTDFW857-08|Eristalis tenax|COI-5P|KM571133	S
TTDFW858-08|Eristalis tenax|COI-5P|KM569755	S
TTDFW859-08|Eristalis tenax|COI-5P|KM571031	S
TTDFW860-08|Eristalis tenax|COI-5P|KM570477	S
TTDFW861-08|Eristalis tenax|COI-5P|KM571452	S
TTDFW870-08|Eristalis transversa|COI-5P|KM570014	S
TTDFW872-08|Eristalis dimidiata|COI-5P|KM570211	S
TTDFW873-08|Eristalis dimidiata|COI-5P|KM571581	S
TTDFW874-08|Eristalis dimidiata|COI-5P|KM571560	S
TTDFW971-08|Eristalis dimidiata|COI-5P|KR522065	S
TTMDJ601-10|Eristalis transversa|COI-5P|HQ982377	S
TTMDJ610-10|Eristalis transversa|COI-5P|HQ982385	S
TTMDJ615-10|Eristalis dimidiata|COI-5P|HQ982390	S
TTMDJ617-10|Eristalis transversa|COI-5P|HQ982391	S
TTMDJ661-10|Eristalis dimidiata|COI-5P|HQ982433	S
TWDIP068-09|Eristalis anthophorina|COI-5P|KR518588	S
UAMIC2967-15|Eristalis flavipes|COI-5P|KU875015	S
UAMIC2979-15|Eristalis hirta|COI-5P|KU875016	S
UAMIC2990-15|Eristalis cryptarum|COI-5P|KU875014	S
UAMIC3025-15|Eristalis hirta|COI-5P|KU875017	S

## Sheet: Helophilus BOLD Position 153
BOLD Sample	COI Position 153
BBDCP853-10|Helophilus hybridus|COI-5P|KR436365	S
BBDCP855-10|Helophilus hybridus|COI-5P|JF869209	S
BBDIT246-11|Helophilus latifrons|COI-5P	S
BIOAI207-14|Helophilus hybridus|COI-5P|KR439258	S
BIOAI341-14|Helophilus hybridus|COI-5P|KR440688	S
CNBFJ054-15|Helophilus hybridus|COI-5P|MF834030	S
CNCDB901-11|Helophilus hybridus|COI-5P|JN991998	S
CNCDB920-11|Helophilus hochstetteri|COI-5P|JN991997	S
CNGSG064-15|Helophilus latifrons|COI-5P|MF836817	S
CNJAC1143-12|Helophilus hybridus|COI-5P|KR466993	S
CNJAF1672-12|Helophilus latifrons|COI-5P|KR462501	S
CNKLC2499-14|Helophilus hybridus|COI-5P|KR467792	S
CNNHG1217-14|Helophilus latifrons|COI-5P|KR586797	S
CNRMD2007-12|Helophilus hybridus|COI-5P|KP049601	S
CNRME020-12|Helophilus hybridus|COI-5P|KP041907	S
CNWBE810-13|Helophilus hybridus|COI-5P|KP040457	S
CNWBE811-13|Helophilus hybridus|COI-5P|KP041229	S
CNWLF2137-12|Helophilus hybridus|COI-5P|KM929297	S
CNWLG1015-12|Helophilus hybridus|COI-5P|KM929285	S
DIMC002-09|Helophilus hybridus|COI-5P|GU013663	S
GMGMM220-14|Helophilus trivittatus|COI-5P	S
GMGMN203-14|Helophilus trivittatus|COI-5P	S
GMGMN204-14|Helophilus trivittatus|COI-5P	S
GMGMN206-14|Helophilus trivittatus|COI-5P	S
GMGMN223-14|Helophilus hybridus|COI-5P	S
GMGMN225-14|Helophilus hybridus|COI-5P	S
GMGMN228-14|Helophilus trivittatus|COI-5P	S
GMGMN229-14|Helophilus trivittatus|COI-5P	S
GMGMN230-14|Helophilus trivittatus|COI-5P	S
GMGMN234-14|Helophilus trivittatus|COI-5P	S
GMGMN235-14|Helophilus trivittatus|COI-5P	S
GMGMN236-14|Helophilus trivittatus|COI-5P	S
GMGMN303-14|Helophilus trivittatus|COI-5P	S
GMGMN308-14|Helophilus hybridus|COI-5P	S
GMGMN320-14|Helophilus trivittatus|COI-5P	S
JSAUG177-11|Helophilus latifrons|COI-5P|KR656412	S
MAMTO614-14|Helophilus hybridus|COI-5P|KY843829	S
MAMTO615-14|Helophilus hybridus|COI-5P|KY839860	S
MAMTO616-14|Helophilus hybridus|COI-5P|KY831277	S
MAMTT202-14|Helophilus hybridus|COI-5P|KY841867	S
MAMTT203-14|Helophilus hybridus|COI-5P|KY831874	S
MAMTV147-14|Helophilus hybridus|COI-5P|KY835472	S
MAMTW449-14|Helophilus hybridus|COI-5P|KY845396	S
MAMTW450-14|Helophilus hybridus|COI-5P|KY830977	S
MAMTW451-14|Helophilus hybridus|COI-5P|KY840079	S
MAMTW452-14|Helophilus hybridus|COI-5P|KY831128	S
MAMTW453-14|Helophilus hybridus|COI-5P|KY840975	S
MAMTW456-14|Helophilus hybridus|COI-5P|KY833449	S
MAMTW457-14|Helophilus hybridus|COI-5P|KY834908	S
MAMTW458-14|Helophilus hybridus|COI-5P|KY834734	S
MAMTW459-14|Helophilus hybridus|COI-5P|KY832692	S
MAMTW460-14|Helophilus hybridus|COI-5P|KY837324	S
MAMTX208-14|Helophilus hybridus|COI-5P|KY831085	S
MAMTY302-14|Helophilus hybridus|COI-5P|KY831443	S
MAMTY303-14|Helophilus hybridus|COI-5P|KY843979	S
MAMTY305-14|Helophilus hybridus|COI-5P|KY833144	S
MAMTY306-14|Helophilus hybridus|COI-5P|KY840314	S
MAMTY312-14|Helophilus hybridus|COI-5P|KY837038	S
NGNAX2137-14|Helophilus latifrons|COI-5P|KT102737	S
NGNAX2162-14|Helophilus latifrons|COI-5P|KT108026	S
NGNAX2202-14|Helophilus latifrons|COI-5P|KT108872	S
NGNAY2856-14|Helophilus hybridus|COI-5P|KT102184	S
NORSY171-12|Helophilus trivittatus|COI-5P	S
NORSY277-12|Helophilus trivittatus|COI-5P	S
NORSY328-12|Helophilus hybridus|COI-5P	S
PMNHE214-15|Helophilus hybridus|COI-5P|KY845733	S
PMNHF422-15|Helophilus hybridus|COI-5P|KY836292	S
PMNHJ143-15|Helophilus hybridus|COI-5P|KY836061	S
PMNHJ145-15|Helophilus hybridus|COI-5P|KY835750	S
PMNHJ146-15|Helophilus hybridus|COI-5P|KY832320	S
PMNHJ147-15|Helophilus hybridus|COI-5P|KY844010	S
PMNHJ148-15|Helophilus hybridus|COI-5P|KY834520	S
PMNHJ149-15|Helophilus hybridus|COI-5P|KY831664	S
PMNHK011-15|Helophilus hybridus|COI-5P|KY831160	S
PMNHL005-15|Helophilus hybridus|COI-5P|KY830776	S
PMNHL006-15|Helophilus hybridus|COI-5P|KY835559	S
PMNHL007-15|Helophilus hybridus|COI-5P|KY845945	S
PMNHL010-15|Helophilus hybridus|COI-5P|KY832418	S
PMNHL011-15|Helophilus hybridus|COI-5P|KY832454	S
PMNHL015-15|Helophilus hybridus|COI-5P|KY842175	S
PMNHL019-15|Helophilus hybridus|COI-5P|KY838024	S
PMNHL020-15|Helophilus hybridus|COI-5P|KY845894	S
PMNHL022-15|Helophilus hybridus|COI-5P|KY840575	S
PMNHL023-15|Helophilus hybridus|COI-5P|KY836750	S
PMNHM002-15|Helophilus hybridus|COI-5P|KY839233	S
PMNHM003-15|Helophilus hybridus|COI-5P|KY833234	S
PMNHM005-15|Helophilus hybridus|COI-5P|KY842225	S
PMNHN378-15|Helophilus hybridus|COI-5P|KY838457	S
PMNHN380-15|Helophilus hybridus|COI-5P|KY833072	S
PMNHN385-15|Helophilus hybridus|COI-5P|KY834634	S
PMNHN388-15|Helophilus hybridus|COI-5P|KY838039	S
PMNHN396-15|Helophilus hybridus|COI-5P|KY833603	S
PMNHN397-15|Helophilus hybridus|COI-5P|KY845782	S
PMNHN401-15|Helophilus hybridus|COI-5P|KY844055	S
PMNHN404-15|Helophilus hybridus|COI-5P|KY831570	S
PMNHN407-15|Helophilus hybridus|COI-5P|KY833658	S
RRSSC6581-15|Helophilus latifrons|COI-5P|MG167992	S
SMTPM2363-15|Helophilus latifrons|COI-5P|MG168241	S
SSBAD3758-12|Helophilus hybridus|COI-5P|KM942579	S
SSBCA2746-15|Helophilus latifrons|COI-5P|MG166007	S
SSEIB12013-13|Helophilus hybridus|COI-5P|KM949614	S
SSEIB12036-13|Helophilus hybridus|COI-5P|KM952364	S
SSEIB13204-13|Helophilus hybridus|COI-5P|KM972197	S
SSEIB13309-13|Helophilus hybridus|COI-5P|KM967910	S
SSJAB1064-13|Helophilus latifrons|COI-5P|KM956104	S
SSJAB1383-13|Helophilus hybridus|COI-5P|KM968868	S
SSJAB1388-13|Helophilus hybridus|COI-5P|KM956802	S
SSJAB3151-13|Helophilus hybridus|COI-5P|KM954742	S
SSJAB3153-13|Helophilus hybridus|COI-5P|KM968979	S
SSJAE10542-13|Helophilus hybridus|COI-5P|KM917826	S
SSJAE10738-13|Helophilus hybridus|COI-5P|KM909807	S
SSJAE10788-13|Helophilus hybridus|COI-5P|KM898162	S
SSJAE10895-13|Helophilus hybridus|COI-5P|KM919850	S
SSJAE1826-13|Helophilus hybridus|COI-5P|KM897691	S
SSJAE3291-13|Helophilus hybridus|COI-5P|KM906013	S
SSJAE5146-13|Helophilus hybridus|COI-5P|KM898512	S
SSJAE5147-13|Helophilus hybridus|COI-5P|KM912637	S
SSJAE5149-13|Helophilus hybridus|COI-5P|KM904674	S
SSJAE5150-13|Helophilus hybridus|COI-5P|KM918416	S
SSJAE5151-13|Helophilus hybridus|COI-5P|KM903938	S
SSJAE5152-13|Helophilus hybridus|COI-5P|KM905245	S
SSJAE6342-13|Helophilus hybridus|COI-5P|KM901695	S
SSJAE6344-13|Helophilus hybridus|COI-5P|KM911990	S
SSJAE6345-13|Helophilus hybridus|COI-5P|KM905052	S
SSJAE6346-13|Helophilus hybridus|COI-5P|KM899248	S
SSJAE6347-13|Helophilus hybridus|COI-5P|KM915561	S
SSJAE6487-13|Helophilus hybridus|COI-5P|KM914558	S
SSJAE6488-13|Helophilus hybridus|COI-5P|KM908067	S
SSJAE6588-13|Helophilus hybridus|COI-5P|KM917087	S
SSJAF7447-13|Helophilus hybridus|COI-5P|KM915996	S
SSJAF7504-13|Helophilus hybridus|COI-5P|KM921487	S
SSJAF7570-13|Helophilus hybridus|COI-5P|KM907780	S
SSKNA8189-15|Helophilus hybridus|COI-5P|MG164654	S
SSPAA2896-13|Helophilus hybridus|COI-5P|KM898293	S
SSPAA6197-13|Helophilus hybridus|COI-5P|KM900237	S
SSPAA6200-13|Helophilus hybridus|COI-5P|KM902489	S
SSPAB5012-13|Helophilus hybridus|COI-5P|KM904090	S
SSPAC6946-13|Helophilus hybridus|COI-5P|KM625087	S
SSWLB1701-13|Helophilus hybridus|COI-5P|KM629804	S
TTDFW027-08|Helophilus hybridus|COI-5P|KM571125	S
TTDFW229-08|Helophilus hybridus|COI-5P|KR521604	S
TTDFW398-08|Helophilus hybridus|COI-5P|KM570279	S
TTDFW399-08|Helophilus hybridus|COI-5P|KM570203	S
TTDFW400-08|Helophilus latifrons|COI-5P|KM571769	S
TTDFW401-08|Helophilus hybridus|COI-5P|KM571374	S
TTDFW402-08|Helophilus hybridus|COI-5P|KM571641	S
TTDFW588-08|Helophilus hybridus|COI-5P|KM569753	S
ASDMT1882-12|Helophilus fasciatus|COI-5P|KR432137	T
BARSB164-16|Helophilus fasciatus|COI-5P	T
BBDCP770-10|Helophilus lapponicus|COI-5P|JF869126	T
BBDCP771-10|Helophilus lapponicus|COI-5P|JF869127	T
BBDCP772-10|Helophilus lapponicus|COI-5P|JF869128	T
BBDCP851-10|Helophilus fasciatus|COI-5P|JF869206	T
BBDCP852-10|Helophilus fasciatus|COI-5P|JF869207	T
BBDCP854-10|Helophilus fasciatus|COI-5P|JF869208	T
BBDCP856-10|Helophilus fasciatus|COI-5P|JF869210	T
BBDCP857-10|Helophilus fasciatus|COI-5P|JF869211	T
BBDCP858-10|Helophilus groenlandicus|COI-5P|JF869212	T
BBDCQ788-10|Helophilus fasciatus|COI-5P|JN291563	T
BBDEC033-09|Helophilus lapponicus|COI-5P|GU689807	T
BBDEC198-09|Helophilus obscurus|COI-5P|GU690022	T
BBDEC199-09|Helophilus obscurus|COI-5P|GU690024	T
BBDEC200-09|Helophilus obscurus|COI-5P|GU690023	T
BBDEC201-09|Helophilus obscurus|COI-5P|GU690025	T
BEEEE379-16|Helophilus pendulus|COI-5P	T
BMAPH228-15|Helophilus groenlandicus|COI-5P|MG163788	T
CNBAC761-12|Helophilus obscurus|COI-5P|KR442579	T
CNBAK465-13|Helophilus pendulus|COI-5P|KR438352	T
CNBPC251-13|Helophilus fasciatus|COI-5P|KR429599	T
CNBPD721-13|Helophilus fasciatus|COI-5P|KR425867	T
CNBPK393-13|Helophilus fasciatus|COI-5P|KR427247	T
CNBPK394-13|Helophilus fasciatus|COI-5P|KR429500	T
CNBPL382-13|Helophilus fasciatus|COI-5P|KR432943	T
CNBPM431-13|Helophilus fasciatus|COI-5P|KR426543	T
CNBPM455-13|Helophilus fasciatus|COI-5P|KR441807	T
CNCDB872-11|Helophilus pendulus|COI-5P|JN991999	T
CNGBH791-14|Helophilus fasciatus|COI-5P|KR397941	T
CNGBH792-14|Helophilus fasciatus|COI-5P|KR389488	T
CNGBH795-14|Helophilus fasciatus|COI-5P|KR387220	T
CNGBL026-14|Helophilus fasciatus|COI-5P|KR387671	T
CNJAC1146-12|Helophilus lapponicus|COI-5P|KR457947	T
CNKLC2496-14|Helophilus lapponicus|COI-5P|KR468393	T
CNKLC2551-14|Helophilus lapponicus|COI-5P|KR469050	T
CNKOS014-14|Helophilus fasciatus|COI-5P|KR395684	T
CNNHE1701-14|Helophilus lapponicus|COI-5P|KR497218	T
CNPKL102-14|Helophilus fasciatus|COI-5P|KR399405	T
CNRMH106-12|Helophilus fasciatus|COI-5P|KP039864	T
CNROJ055-13|Helophilus fasciatus|COI-5P|KR398031	T
CNTGC129-15|Helophilus lapponicus|COI-5P|KR982041	T
CNTGC130-15|Helophilus lapponicus|COI-5P|KR979919	T
CNTNH1263-14|Helophilus obscurus|COI-5P|KR382436	T
CNWAH6320-15|Helophilus lapponicus|COI-5P|KR979013	T
DRYAS10377-15|Helophilus lapponicus|COI-5P	T
DRYAS10393-15|Helophilus groenlandicus|COI-5P	T
DRYAS10483-15|Helophilus lapponicus|COI-5P	T
DRYAS10497-15|Helophilus lapponicus|COI-5P	T
DRYAS10599-15|Helophilus lapponicus|COI-5P	T
DRYAS10608-15|Helophilus lapponicus|COI-5P	T
DRYAS10610-15|Helophilus lapponicus|COI-5P	T
DRYAS10669-15|Helophilus lapponicus|COI-5P	T
DRYAS11312-15|Helophilus lapponicus|COI-5P	T
DRYAS14164-15|Helophilus lapponicus|COI-5P	T
DRYAS14368-15|Helophilus groenlandicus|COI-5P	T
DRYAS14530-15|Helophilus lapponicus|COI-5P	T
DRYAS14781-15|Helophilus lapponicus|COI-5P	T
DRYAS14940-15|Helophilus lapponicus|COI-5P	T
DRYAS15019-15|Helophilus lapponicus|COI-5P	T
DRYAS15027-15|Helophilus lapponicus|COI-5P	T
DRYAS15091-15|Helophilus lapponicus|COI-5P	T
DRYAS19026-15|Helophilus lapponicus|COI-5P	T
DRYAS19441-15|Helophilus lapponicus|COI-5P	T
DRYAS20150-15|Helophilus lapponicus|COI-5P	T
DRYAS20224-15|Helophilus groenlandicus|COI-5P	T
DRYAS20225-15|Helophilus groenlandicus|COI-5P	T
DRYAS20385-15|Helophilus lapponicus|COI-5P	T
DRYAS6360-14|Helophilus groenlandicus|COI-5P	T
DRYAS8741-15|Helophilus lapponicus|COI-5P	T
DRYAS8810-15|Helophilus lapponicus|COI-5P	T
DRYAS8857-15|Helophilus lapponicus|COI-5P	T
DRYAS8876-15|Helophilus lapponicus|COI-5P	T
DRYAS8931-15|Helophilus lapponicus|COI-5P	T
DRYAS8979-15|Helophilus lapponicus|COI-5P	T
DRYAS8992-15|Helophilus lapponicus|COI-5P	T
DRYAS9002-15|Helophilus lapponicus|COI-5P	T
GBDP1209-06|Helophilus pendulus|COI-5P|AY261704	T
GBMIN17997-13|Helophilus virgatus|COI-5P|KC135953	T
GBMIN18122-13|Helophilus virgatus|COI-5P|KC135952	T
GBSYR025-10|Helophilus pendulus|COI-5P|EU431485	T
GMGMB757-14|Helophilus pendulus|COI-5P	T
GMGMD225-14|Helophilus pendulus|COI-5P	T
GMGME131-14|Helophilus pendulus|COI-5P	T
GMGME134-14|Helophilus pendulus|COI-5P	T
GMGMN195-14|Helophilus pendulus|COI-5P	T
GMGMN196-14|Helophilus pendulus|COI-5P	T
GMGMN209-14|Helophilus pendulus|COI-5P	T
GMGMN324-14|Helophilus pendulus|COI-5P	T
GMOAG018-15|Helophilus fasciatus|COI-5P|MG166800	T
GMOVE080-15|Helophilus lapponicus|COI-5P|MG167068	T
HMCOL001-07|Helophilus groenlandicus|COI-5P|KR642323	T
HMCOL002-07|Helophilus groenlandicus|COI-5P|KR644425	T
HMCOL003-07|Helophilus groenlandicus|COI-5P|KR645789	T
HMCOL004-07|Helophilus groenlandicus|COI-5P|KR634835	T
HMCOL005-07|Helophilus groenlandicus|COI-5P|KR633664	T
HMCOL006-07|Helophilus groenlandicus|COI-5P|KR651624	T
HMCOL007-07|Helophilus groenlandicus|COI-5P|KR647712	T
HMCOL008-07|Helophilus groenlandicus|COI-5P|KR640927	T
HMCOL009-07|Helophilus groenlandicus|COI-5P|KR639569	T
HMCOL010-07|Helophilus groenlandicus|COI-5P|KR652720	T
JSFLA017-08|Helophilus groenlandicus|COI-5P|KR669252	T
JSFLA019-08|Helophilus lapponicus|COI-5P|KR668364	T
JSSEP1090-11|Helophilus fasciatus|COI-5P|KR664501	T
JSSEP1092-11|Helophilus fasciatus|COI-5P|KR658671	T
JWDCB004-10|Helophilus lapponicus|COI-5P|HM860973	T
JWDCC857-10|Helophilus lapponicus|COI-5P|HM861979	T
JWDCD125-10|Helophilus lapponicus|COI-5P|HM862177	T
JWDCI149-10|Helophilus lapponicus|COI-5P|JF877246	T
JWDCI150-10|Helophilus lapponicus|COI-5P|JF877247	T
JWDCI151-10|Helophilus lapponicus|COI-5P|JF877248	T
JWDCJ542-11|Helophilus lapponicus|COI-5P|JF878105	T
JWDCJ610-11|Helophilus lapponicus|COI-5P|KR668570	T
JWDCJ611-11|Helophilus lapponicus|COI-5P|KR661734	T
JWDCJ612-11|Helophilus lapponicus|COI-5P|KR656240	T
LASPA030-16|Helophilus fasciatus|COI-5P|MG167383	T
LASPA031-16|Helophilus fasciatus|COI-5P|MG167925	T
LASPA032-16|Helophilus fasciatus|COI-5P|MG163595	T
LASPA033-16|Helophilus fasciatus|COI-5P|MG169677	T
LRSYR021-07|Helophilus groenlandicus|COI-5P|KR659419	T
LRSYR022-07|Helophilus obscurus|COI-5P|KR660812	T
LRSYR024-07|Helophilus obscurus|COI-5P|KR667977	T
LRSYR029-07|Helophilus lapponicus|COI-5P|KR662690	T
LRSYR053-07|Helophilus obscurus|COI-5P|KR666893	T
LRSYR056-07|Helophilus obscurus|COI-5P|KR655218	T
MBIOP756-14|Helophilus fasciatus|COI-5P|KR672634	T
MHCOL065-07|Helophilus groenlandicus|COI-5P|KR665967	T
MHCOL066-07|Helophilus groenlandicus|COI-5P|KR666434	T
MHCOL067-07|Helophilus groenlandicus|COI-5P|KR662784	T
MHCOL068-07|Helophilus groenlandicus|COI-5P|KR657425	T
MHCOL069-07|Helophilus groenlandicus|COI-5P|KR665394	T
MHCOL070-07|Helophilus groenlandicus|COI-5P|KR667134	T
MHSYR008-06|Helophilus obscurus|COI-5P	T
MHSYR009-06|Helophilus obscurus|COI-5P	T
MHSYR010-06|Helophilus obscurus|COI-5P	T
MHSYR011-06|Helophilus obscurus|COI-5P	T
MHSYR012-06|Helophilus obscurus|COI-5P	T
MHSYR013-06|Helophilus sp. nov.|COI-5P	T
MHSYR014-06|Helophilus obscurus|COI-5P	T
MHSYR015-06|Helophilus obscurus|COI-5P	T
MHSYR016-06|Helophilus obscurus|COI-5P	T
MHSYR017-06|Helophilus obscurus|COI-5P	T
MHSYR018-06|Helophilus obscurus|COI-5P	T
MHSYR019-06|Helophilus obscurus|COI-5P	T
MHSYR020-06|Helophilus groenlandicus|COI-5P	T
MHSYR021-06|Helophilus obscurus|COI-5P	T
MHSYR022-06|Helophilus obscurus|COI-5P	T
MHSYR023-06|Helophilus lapponicus|COI-5P	T
MHSYR025-06|Helophilus groenlandicus|COI-5P	T
MHSYR038-07|Helophilus obscurus|COI-5P	T
MHSYR039-07|Helophilus obscurus|COI-5P	T
MHSYR040-07|Helophilus obscurus|COI-5P	T
MHSYR041-07|Helophilus obscurus|COI-5P	T
MHSYR042-07|Helophilus obscurus|COI-5P	T
MHSYR043-07|Helophilus obscurus|COI-5P	T
MHSYR044-07|Helophilus obscurus|COI-5P	T
MHSYR045-07|Helophilus obscurus|COI-5P	T
MHSYR046-07|Helophilus obscurus|COI-5P	T
MHSYR047-07|Helophilus obscurus|COI-5P	T
MHSYR048-07|Helophilus obscurus|COI-5P	T
MHSYR049-07|Helophilus obscurus|COI-5P	T
MHSYR050-07|Helophilus obscurus|COI-5P	T
MHSYR051-07|Helophilus obscurus|COI-5P	T
MHSYR052-07|Helophilus obscurus|COI-5P	T
MHSYR053-07|Helophilus obscurus|COI-5P	T
MHSYR055-07|Helophilus groenlandicus|COI-5P	T
MHSYR056-07|Helophilus groenlandicus|COI-5P	T
MHSYR057-07|Helophilus groenlandicus|COI-5P	T
MHSYR058-07|Helophilus obscurus|COI-5P	T
MHSYR061-07|Helophilus obscurus|COI-5P	T
MHSYR063-07|Helophilus obscurus|COI-5P	T
MHSYR064-07|Helophilus obscurus|COI-5P	T
MHSYR065-07|Helophilus obscurus|COI-5P	T
MHSYR067-07|Helophilus obscurus|COI-5P	T
MHSYR068-07|Helophilus obscurus|COI-5P	T
MHSYR069-07|Helophilus obscurus|COI-5P	T
MHSYR070-07|Helophilus obscurus|COI-5P	T
MHSYR071-07|Helophilus obscurus|COI-5P	T
MHSYR073-07|Helophilus obscurus|COI-5P	T
MHSYR075-07|Helophilus obscurus|COI-5P	T
MHSYR076-07|Helophilus obscurus|COI-5P	T
MHSYR078-07|Helophilus obscurus|COI-5P	T
MHSYR079-07|Helophilus groenlandicus|COI-5P	T
MHSYR080-07|Helophilus obscurus|COI-5P	T
MHSYR081-07|Helophilus obscurus|COI-5P	T
MHSYR082-07|Helophilus obscurus|COI-5P	T
MHSYR083-07|Helophilus obscurus|COI-5P	T
MHSYR084-07|Helophilus obscurus|COI-5P	T
MHSYR085-07|Helophilus obscurus|COI-5P	T
MHSYR086-07|Helophilus obscurus|COI-5P	T
MHSYR087-07|Helophilus obscurus|COI-5P	T
MHSYR088-07|Helophilus obscurus|COI-5P	T
MHSYR089-07|Helophilus obscurus|COI-5P	T
MHSYR090-07|Helophilus obscurus|COI-5P	T
MHSYR091-07|Helophilus obscurus|COI-5P	T
MHSYR092-07|Helophilus obscurus|COI-5P	T
MHSYR094-07|Helophilus obscurus|COI-5P	T
MHSYR139-07|Helophilus obscurus|COI-5P	T
MHSYR145-07|Helophilus groenlandicus|COI-5P	T
MHSYR147-07|Helophilus obscurus|COI-5P	T
MHSYR149-07|Helophilus obscurus|COI-5P	T
MHSYR150-07|Helophilus obscurus|COI-5P	T
MHSYR151-07|Helophilus obscurus|COI-5P	T
MHSYR152-07|Helophilus obscurus|COI-5P	T
MHSYR153-07|Helophilus obscurus|COI-5P	T
MHSYR154-07|Helophilus obscurus|COI-5P	T
MHSYR155-07|Helophilus obscurus|COI-5P	T
MHSYR156-07|Helophilus obscurus|COI-5P	T
MHSYR157-07|Helophilus obscurus|COI-5P	T
MHSYR161-07|Helophilus obscurus|COI-5P	T
MHSYR162-07|Helophilus sp. nov.|COI-5P	T
MHSYR163-07|Helophilus obscurus|COI-5P	T
MHSYR165-07|Helophilus sp. nov.|COI-5P	T
MHSYR167-07|Helophilus obscurus|COI-5P	T
MHSYR173-07|Helophilus obscurus|COI-5P	T
MHSYR174-07|Helophilus obscurus|COI-5P	T
MHSYR179-07|Helophilus obscurus|COI-5P	T
MHSYR181-07|Helophilus obscurus|COI-5P	T
MHSYR195-07|Helophilus obscurus|COI-5P	T
MHSYR196-07|Helophilus sp. nov.|COI-5P	T
MHSYR200-07|Helophilus obscurus|COI-5P	T
MHSYR203-07|Helophilus sp. nov.|COI-5P	T
MHSYR211-07|Helophilus obscurus|COI-5P	T
MHSYR212-07|Helophilus obscurus|COI-5P	T
MHSYR213-07|Helophilus obscurus|COI-5P	T
MHSYR214-07|Helophilus obscurus|COI-5P	T
MHSYR215-07|Helophilus obscurus|COI-5P	T
MHSYR216-07|Helophilus obscurus|COI-5P	T
MHSYR220-07|Helophilus obscurus|COI-5P	T
MHSYR221-07|Helophilus obscurus|COI-5P	T
MHSYR223-07|Helophilus obscurus|COI-5P	T
MHSYR336-07|Helophilus groenlandicus|COI-5P	T
MHSYR380-07|Helophilus lapponicus|COI-5P	T
MHSYR405-07|Helophilus lapponicus|COI-5P	T
MHSYR411-07|Helophilus groenlandicus|COI-5P	T
NCCA2518-11|Helophilus fasciatus|COI-5P|KR679236	T
NCCA2529-11|Helophilus fasciatus|COI-5P|KR687485	T
NCCA2530-11|Helophilus fasciatus|COI-5P|KR684168	T
NCCA2531-11|Helophilus fasciatus|COI-5P|KR696165	T
NCCA2532-11|Helophilus fasciatus|COI-5P|KR677709	T
NCCA2533-11|Helophilus fasciatus|COI-5P|KR694974	T
NGAAA014-14|Helophilus fasciatus|COI-5P|KR680499	T
NGAAA040-14|Helophilus fasciatus|COI-5P|KR678448	T
NGAAB1203-14|Helophilus fasciatus|COI-5P|KR682474	T
NGNAY2860-14|Helophilus fasciatus|COI-5P|KT102582	T
NGNAZ591-14|Helophilus fasciatus|COI-5P|KT100668	T
NORSY075-12|Helophilus pendulus|COI-5P	T
NORSY218-12|Helophilus pendulus|COI-5P	T
NORSY327-12|Helophilus affinis|COI-5P	T
NORSY435-15|Helophilus groenlandicus|COI-5P	T
OPPDI2145-17|Helophilus fasciatus|COI-5P	T
OPPEI4132-17|Helophilus fasciatus|COI-5P	T
OPPFS012-17|Helophilus fasciatus|COI-5P	T
OPPFS013-17|Helophilus fasciatus|COI-5P	T
OPPFS017-17|Helophilus fasciatus|COI-5P	T
OPPFS149-17|Helophilus fasciatus|COI-5P	T
OPPFS151-17|Helophilus fasciatus|COI-5P	T
OPPFS153-17|Helophilus fasciatus|COI-5P	T
OPPFS154-17|Helophilus fasciatus|COI-5P	T
OPPQI082-17|Helophilus fasciatus|COI-5P	T
OPPUC002-17|Helophilus fasciatus|COI-5P	T
OPPZA081-17|Helophilus fasciatus|COI-5P	T
RBINA1555-13|Helophilus fasciatus|COI-5P|KR751669	T
RBINA4322-13|Helophilus fasciatus|COI-5P|KR756769	T
RBINA5390-13|Helophilus fasciatus|COI-5P|KR745290	T
RBINA5411-13|Helophilus fasciatus|COI-5P|KR755790	T
RBINA947-13|Helophilus fasciatus|COI-5P|KR739395	T
RBINA948-13|Helophilus fasciatus|COI-5P|KR754423	T
RBINA949-13|Helophilus fasciatus|COI-5P|KR749672	T
RBINA951-13|Helophilus fasciatus|COI-5P|KR746466	T
SMTPB10485-13|Helophilus fasciatus|COI-5P|KR739974	T
SMTPB16125-13|Helophilus fasciatus|COI-5P|KR742330	T
SMTPB6091-13|Helophilus fasciatus|COI-5P|KR772759	T
SMTPD1170-13|Helophilus fasciatus|COI-5P|KR777820	T
SMTPD1731-13|Helophilus fasciatus|COI-5P|KR766322	T
SMTPD2584-13|Helophilus fasciatus|COI-5P|KR764955	T
SMTPD303-13|Helophilus fasciatus|COI-5P|KR759128	T
SMTPD5155-13|Helophilus fasciatus|COI-5P|KR764007	T
SMTPD5471-13|Helophilus fasciatus|COI-5P|KR776633	T
SMTPD5481-13|Helophilus fasciatus|COI-5P|KR764304	T
SMTPF5790-14|Helophilus fasciatus|COI-5P|KR764117	T
SMTPF5791-14|Helophilus fasciatus|COI-5P|KR765977	T
SMTPF9966-14|Helophilus fasciatus|COI-5P|KR771769	T
SMTPJ915-14|Helophilus fasciatus|COI-5P|KR717119	T
SMTPL074-15|Helophilus fasciatus|COI-5P|MG167133	T
SMTPL4789-15|Helophilus fasciatus|COI-5P|MG164993	T
SMTPL5291-15|Helophilus fasciatus|COI-5P|MG166982	T
SMTPL5293-15|Helophilus fasciatus|COI-5P|MG169309	T
SMTPL5296-15|Helophilus fasciatus|COI-5P|MG165159	T
SMTPL5330-15|Helophilus fasciatus|COI-5P|MG163796	T
SMTPL7372-15|Helophilus fasciatus|COI-5P|MG169849	T
SMTPM4192-15|Helophilus fasciatus|COI-5P|MG170719	T
SMTPO4678-15|Helophilus fasciatus|COI-5P|MG166294	T
SMTPR5406-16|Helophilus fasciatus|COI-5P|MG163294	T
SMTPR774-16|Helophilus fasciatus|COI-5P|MG165426	T
SMTPS745-16|Helophilus fasciatus|COI-5P|MG169461	T
SMTPS754-16|Helophilus fasciatus|COI-5P|MG168565	T
SONA220-07|Helophilus fasciatus|COI-5P	T
SONA410-09|Helophilus sp. nov.|COI-5P	T
SONA425-09|Helophilus lapponicus|COI-5P	T
SSKJA3772-14|Helophilus fasciatus|COI-5P|MF829544	T
SSKUA5939-15|Helophilus lapponicus|COI-5P|MF836102	T
SSKUB10473-15|Helophilus obscurus|COI-5P|MF831222	T
SSKUB12506-15|Helophilus obscurus|COI-5P|MF832198	T
SSKUB12519-15|Helophilus obscurus|COI-5P|MF829235	T
SSKUB192-15|Helophilus lapponicus|COI-5P|MF828812	T
SSKUB194-15|Helophilus lapponicus|COI-5P|MF833313	T
SSKUB9840-15|Helophilus obscurus|COI-5P|MF835496	T
SSKUB9841-15|Helophilus obscurus|COI-5P|MF835518	T
SSKUB9842-15|Helophilus lapponicus|COI-5P|MF831228	T
SSKUB9843-15|Helophilus obscurus|COI-5P|MF833541	T
SSKUB9844-15|Helophilus lapponicus|COI-5P|MF834236	T
SSPAA6204-13|Helophilus obscurus|COI-5P|KM914971	T
SSROC5297-15|Helophilus fasciatus|COI-5P|MF830622	T
TTDBW173-08|Helophilus fasciatus|COI-5P|KR516724	T
TTDBW220-09|Helophilus fasciatus|COI-5P|KR524891	T
TTDBW221-09|Helophilus fasciatus|COI-5P|KR521251	T
TTDFW196-08|Helophilus fasciatus|COI-5P|KM570153	T
TTDFW964-08|Helophilus fasciatus|COI-5P|KM571749	T
TTMDJ571-10|Helophilus fasciatus|COI-5P|HQ982351	T
TTMDJ607-10|Helophilus fasciatus|COI-5P|HQ982382	T
TTMDJ612-10|Helophilus fasciatus|COI-5P|HQ982387	T
TTMDJ613-10|Helophilus fasciatus|COI-5P|HQ982388	T
TTMDJ614-10|Helophilus fasciatus|COI-5P|HQ982389	T
UAMIC2981-15|Helophilus hybridus|COI-5P|KU875183	T
ZERO131-11|Helophilus groenlandicus|COI-5P|KU373537	T
ZERO132-11|Helophilus groenlandicus|COI-5P|KU373965	T
ZERO133-11|Helophilus groenlandicus|COI-5P|KU374446	T
ZERO134-11|Helophilus groenlandicus|COI-5P|KU374382	T
ZERO135-11|Helophilus groenlandicus|COI-5P|KU373788	T
ZERO136-11|Helophilus groenlandicus|COI-5P|KU373481	T
ZERO137-11|Helophilus lapponicus|COI-5P|KU373568	T
ZERO138-11|Helophilus lapponicus|COI-5P|KU374783	T
ZERO139-11|Helophilus lapponicus|COI-5P|KU374047	T
ZERO140-11|Helophilus lapponicus|COI-5P|KU373404	T
ZERO141-11|Helophilus lapponicus|COI-5P|KU374312	T

## Sheet: Lejops BOLD Position 153
BOLD Sample	COI Position 153
BARSL241-16|Lejops lunulatus|COI-5P	S
BBDCN008-10|Lejops lineatus|COI-5P|JF867597	S
BBDCN028-10|Lejops lineatus|COI-5P|JF867616	S
BBDCN056-10|Lejops lineatus|COI-5P|JF867644	S
BBDCQ920-10|Lejops lineatus|COI-5P|JN291684	S
BBDCQ923-10|Lejops lineatus|COI-5P|JN291687	S
BBDEC082-09|Lejops lunulatus|COI-5P|GU689804	S
CNGBJ1878-14|Lejops lunulatus|COI-5P|KR391152	S
CNJAC1162-12|Lejops lunulatus|COI-5P|KR460962	S
CNNHA189-14|Lejops lunulatus|COI-5P|KR507076	S
CNPPB108-12|Lejops lineatus|COI-5P|KJ084810	S
CNPPB127-12|Lejops lineatus|COI-5P|KJ165080	S
CNPPB1725-12|Lejops lineatus|COI-5P|KJ084223	S
CNPPB1757-12|Lejops lineatus|COI-5P|KJ087391	S
CNPPB2012-12|Lejops lineatus|COI-5P|KJ087202	S
CNPPC068-12|Lejops lineatus|COI-5P|KJ085100	S
CNPPC072-12|Lejops lineatus|COI-5P|KJ092026	S
CNPPC073-12|Lejops lineatus|COI-5P|KJ088692	S
CNPPC074-12|Lejops lineatus|COI-5P|KJ086933	S
CNPPC085-12|Lejops lineatus|COI-5P|KJ083660	S
CNPPC088-12|Lejops lineatus|COI-5P|KJ167498	S
CNPPC089-12|Lejops lineatus|COI-5P|KJ090690	S
CNPPC100-12|Lejops lineatus|COI-5P|KJ090693	S
CNPPC101-12|Lejops lineatus|COI-5P|KJ085707	S
CNPPC1107-12|Lejops lineatus|COI-5P|KJ085299	S
CNPPC1115-12|Lejops lineatus|COI-5P|KJ083898	S
CNPPC1116-12|Lejops lineatus|COI-5P|KJ090660	S
CNPPC1117-12|Lejops lineatus|COI-5P|KJ089184	S
CNPPC1121-12|Lejops lineatus|COI-5P|KJ087181	S
CNPPC1122-12|Lejops lineatus|COI-5P|KJ086640	S
CNPPC1127-12|Lejops lineatus|COI-5P|KJ088798	S
CNPPC1128-12|Lejops lineatus|COI-5P|KJ083773	S
CNPPC1132-12|Lejops lineatus|COI-5P|KJ083540	S
CNPPC1160-12|Lejops lineatus|COI-5P|KJ088596	S
CNPPC1178-12|Lejops lineatus|COI-5P|KJ085125	S
CNPPC1379-12|Lejops lineatus|COI-5P|KJ089558	S
CNPPC1712-12|Lejops lineatus|COI-5P|KJ089466	S
CNTIB207-15|Lejops lunulatus|COI-5P|MF837247	S
CNTIB211-15|Lejops lunulatus|COI-5P|MF837025	S
CNTIB212-15|Lejops lunulatus|COI-5P|MF829230	S
CNTIC3959-15|Lejops lunulatus|COI-5P|MF834274	S
CNTIC3973-15|Lejops lineatus|COI-5P|MF832751	S
CNTIC3975-15|Lejops lineatus|COI-5P|MF835763	S
CNTID3997-15|Lejops lineatus|COI-5P|MF834374	S
DKNWR074-11|Lejops perfidiosus|COI-5P|JN582218	S
DRYAS10386-15|Lejops lunulatus|COI-5P	S
DRYAS10390-15|Lejops lunulatus|COI-5P	S
DRYAS10404-15|Lejops lunulatus|COI-5P	S
DRYAS10421-15|Lejops lunulatus|COI-5P	S
DRYAS10451-15|Lejops lunulatus|COI-5P	S
DRYAS10453-15|Lejops lunulatus|COI-5P	S
DRYAS10460-15|Lejops lunulatus|COI-5P	S
DRYAS10461-15|Lejops lunulatus|COI-5P	S
DRYAS10463-15|Lejops lunulatus|COI-5P	S
DRYAS10473-15|Lejops lunulatus|COI-5P	S
DRYAS10477-15|Lejops lunulatus|COI-5P	S
DRYAS10498-15|Lejops lunulatus|COI-5P	S
DRYAS10525-15|Lejops lunulatus|COI-5P	S
DRYAS10526-15|Lejops lunulatus|COI-5P	S
DRYAS10531-15|Lejops lunulatus|COI-5P	S
DRYAS10545-15|Lejops lunulatus|COI-5P	S
DRYAS10550-15|Lejops lunulatus|COI-5P	S
DRYAS10558-15|Lejops lunulatus|COI-5P	S
DRYAS10565-15|Lejops lunulatus|COI-5P	S
DRYAS10570-15|Lejops lunulatus|COI-5P	S
DRYAS10572-15|Lejops lunulatus|COI-5P	S
DRYAS10573-15|Lejops lunulatus|COI-5P	S
DRYAS10588-15|Lejops lunulatus|COI-5P	S
DRYAS10590-15|Lejops lunulatus|COI-5P	S
DRYAS10595-15|Lejops lunulatus|COI-5P	S
DRYAS10601-15|Lejops lunulatus|COI-5P	S
DRYAS10609-15|Lejops lunulatus|COI-5P	S
DRYAS10629-15|Lejops lunulatus|COI-5P	S
DRYAS10634-15|Lejops lunulatus|COI-5P	S
DRYAS10635-15|Lejops lunulatus|COI-5P	S
DRYAS10641-15|Lejops lunulatus|COI-5P	S
DRYAS10647-15|Lejops lunulatus|COI-5P	S
DRYAS10656-15|Lejops lunulatus|COI-5P	S
DRYAS10667-15|Lejops lunulatus|COI-5P	S
DRYAS10670-15|Lejops lunulatus|COI-5P	S
DRYAS10689-15|Lejops lunulatus|COI-5P	S
DRYAS10698-15|Lejops lunulatus|COI-5P	S
DRYAS10699-15|Lejops lunulatus|COI-5P	S
DRYAS14786-15|Lejops lunulatus|COI-5P	S
DRYAS14793-15|Lejops lunulatus|COI-5P	S
DRYAS14806-15|Lejops lunulatus|COI-5P	S
DRYAS14807-15|Lejops lunulatus|COI-5P	S
DRYAS14809-15|Lejops lunulatus|COI-5P	S
DRYAS14810-15|Lejops lunulatus|COI-5P	S
DRYAS14812-15|Lejops lunulatus|COI-5P	S
DRYAS14822-15|Lejops lunulatus|COI-5P	S
DRYAS14824-15|Lejops lunulatus|COI-5P	S
DRYAS14825-15|Lejops lunulatus|COI-5P	S
DRYAS14846-15|Lejops lunulatus|COI-5P	S
DRYAS14848-15|Lejops lunulatus|COI-5P	S
DRYAS14874-15|Lejops lunulatus|COI-5P	S
DRYAS14882-15|Lejops lunulatus|COI-5P	S
DRYAS14884-15|Lejops lunulatus|COI-5P	S
DRYAS14886-15|Lejops lunulatus|COI-5P	S
DRYAS14913-15|Lejops lunulatus|COI-5P	S
DRYAS14915-15|Lejops lunulatus|COI-5P	S
DRYAS14916-15|Lejops lunulatus|COI-5P	S
DRYAS14923-15|Lejops lunulatus|COI-5P	S
DRYAS14926-15|Lejops lunulatus|COI-5P	S
DRYAS14966-15|Lejops lunulatus|COI-5P	S
DRYAS14968-15|Lejops lunulatus|COI-5P	S
DRYAS14969-15|Lejops lunulatus|COI-5P	S
DRYAS14978-15|Lejops lunulatus|COI-5P	S
DRYAS15000-15|Lejops lunulatus|COI-5P	S
DRYAS15002-15|Lejops lunulatus|COI-5P	S
DRYAS15005-15|Lejops lunulatus|COI-5P	S
DRYAS15009-15|Lejops lunulatus|COI-5P	S
DRYAS15015-15|Lejops lunulatus|COI-5P	S
DRYAS15021-15|Lejops lunulatus|COI-5P	S
DRYAS15024-15|Lejops lunulatus|COI-5P	S
DRYAS15033-15|Lejops lunulatus|COI-5P	S
DRYAS15034-15|Lejops lunulatus|COI-5P	S
DRYAS15039-15|Lejops lunulatus|COI-5P	S
DRYAS15042-15|Lejops lunulatus|COI-5P	S
DRYAS15044-15|Lejops lunulatus|COI-5P	S
DRYAS15047-15|Lejops lunulatus|COI-5P	S
DRYAS15048-15|Lejops lunulatus|COI-5P	S
DRYAS15049-15|Lejops lunulatus|COI-5P	S
DRYAS15056-15|Lejops lunulatus|COI-5P	S
DRYAS15057-15|Lejops lunulatus|COI-5P	S
DRYAS15059-15|Lejops lunulatus|COI-5P	S
DRYAS15062-15|Lejops lunulatus|COI-5P	S
DRYAS15074-15|Lejops lunulatus|COI-5P	S
DRYAS15085-15|Lejops lunulatus|COI-5P	S
DRYAS15095-15|Lejops lunulatus|COI-5P	S
DSCFV078-07|Lejops lunulatus|COI-5P|KR638397	S
DSCFV110-07|Lejops lunulatus|COI-5P|KR635551	S
JSDIP279-10|Lejops lunulatus|COI-5P|JF873195	S
JSDIP462-10|Lejops lunulatus|COI-5P|JF873371	S
JSDIP500-10|Lejops lunulatus|COI-5P|JF873409	S
JSDIP995-10|Lejops lineatus|COI-5P|JN301908	S
JSFLA005-08|Lejops lunulatus|COI-5P|KR654622	S
JWDCA480-10|Lejops bilinearis|COI-5P|HM860564	S
JWDCB021-10|Lejops bilinearis|COI-5P|HM860990	S
JWDCC001-10|Lejops lunulatus|COI-5P|HQ962004	S
JWDCC086-10|Lejops lunulatus|COI-5P|HQ962083	S
JWDCC279-10|Lejops bilinearis|COI-5P|HM861491	S
JWDCD046-10|Lejops bilinearis|COI-5P|HM862105	S
JWDCE816-10|Lejops bilinearis|COI-5P|JF874780	S
JWDCF401-10|Lejops bilinearis|COI-5P|JF875210	S
JWDCF639-10|Lejops lunulatus|COI-5P|JF875423	S
JWDCF655-10|Lejops bilinearis|COI-5P|JF875438	S
JWDCF805-10|Lejops bilinearis|COI-5P|JF875576	S
JWDCF806-10|Lejops lunulatus|COI-5P|JF875577	S
JWDCF838-10|Lejops lunulatus|COI-5P|JF875604	S
JWDCF897-10|Lejops lineatus|COI-5P|JF875659	S
JWDCF898-10|Lejops bilinearis|COI-5P|JF875660	S
JWDCF899-10|Lejops lunulatus|COI-5P|JF875661	S
JWDCG033-10|Lejops lunulatus|COI-5P|JF875731	S
JWDCG035-10|Lejops lunulatus|COI-5P|JF875733	S
JWDCG740-10|Lejops lunulatus|COI-5P|JF876276	S
JWDCG799-10|Lejops lunulatus|COI-5P|JF876318	S
JWDCG860-10|Lejops lunulatus|COI-5P|JF876366	S
JWDCH036-10|Lejops lunulatus|COI-5P|JF876437	S
JWDCH777-10|Lejops bilinearis|COI-5P|JF876975	S
JWDCI075-10|Lejops lineatus|COI-5P|JF877187	S
JWDCI413-10|Lejops lunulatus|COI-5P|KR655396	S
JWDCI417-10|Lejops lunulatus|COI-5P|KR661688	S
JWDCJ1405-11|Lejops bilinearis|COI-5P|JN269892	S
JWDCJ299-11|Lejops lunulatus|COI-5P|JF877895	S
JWDCJ846-11|Lejops lunulatus|COI-5P|KR661704	S
JWDCJ847-11|Lejops bilinearis|COI-5P|KR669207	S
JWDCK237-11|Lejops bilinearis|COI-5P|JF878164	S
MHFLI115-06|Lejops lunulatus|COI-5P	S
MHSYR342-07|Lejops bilinearis|COI-5P	S
MHSYR354-07|Lejops bilinearis|COI-5P	S
MHSYR367-07|Lejops lunulatus|COI-5P	S
OPPQA149-17|Lejops lunulatus|COI-5P	S
OPPQA154-17|Lejops lunulatus|COI-5P	S
OPPUM2289-17|Lejops lunulatus|COI-5P	S
POSPA1002-15|Lejops lineatus|COI-5P|MG169705	S
POSPB965-15|Lejops lineatus|COI-5P|MG165599	S
RRSSC2097-15|Lejops lunulatus|COI-5P|MG165047	S
SONA226-07|Lejops lineatus|COI-5P	S
SONA227-07|Lejops lineatus|COI-5P	S
SONA229-07|Lejops lineatus|COI-5P	S
SONA230-07|Lejops lineatus|COI-5P	S
SONA231-07|Lejops lunulatus|COI-5P	S
SONA233-07|Lejops lunulatus|COI-5P	S
SONA235-07|Lejops lunulatus|COI-5P	S
SONA237-07|Lejops perfidiosus|COI-5P	S
SONA416-09|Lejops perfidiosus|COI-5P	S
SONA424-09|Lejops perfidiosus|COI-5P	S
SSBAF4864-13|Lejops lunulatus|COI-5P|KM944792	S
SSBAF4994-13|Lejops lunulatus|COI-5P|KM936502	S
SSEIA8397-13|Lejops lineatus|COI-5P|KM956453	S
SSKOA1192-15|Lejops lunulatus|COI-5P|MF834293	S
SSKOA1193-15|Lejops lunulatus|COI-5P|MF836180	S
SSKOA1194-15|Lejops lunulatus|COI-5P|MF838238	S
SSKOA1195-15|Lejops lunulatus|COI-5P|MF832263	S
SSPEA609-15|Lejops lunulatus|COI-5P|MF828731	S
SSPPA1127-15|Lejops lineatus|COI-5P|MF828804	S
TTDBW583-09|Lejops lineatus|COI-5P|KM570921	S
TTDFW888-08|Lejops lineatus|COI-5P|KM570768	S
TWDIP020-09|Lejops bilinearis|COI-5P|KR516134	S
TWDIP021-09|Lejops bilinearis|COI-5P|KR525650	S
BBDCN010-10|Lejops chrysostomus|COI-5P|JF867599	T
BBDCN027-10|Lejops chrysostomus|COI-5P|JF867615	T
BBDEC100-09|Lejops curvipes|COI-5P|GU689806	T
BBDED078-10|Lejops chrysostomus|COI-5P|HM412590	T
BBDIT291-11|Lejops polygrammus|COI-5P	T
BBDIT292-11|Lejops polygrammus|COI-5P	T
BBDIT293-11|Lejops polygrammus|COI-5P	T
BBDIT294-11|Lejops polygrammus|COI-5P	T
CNPPE1157-12|Lejops chrysostomus|COI-5P|KJ166300	T
CNTIE019-15|Lejops chrysostomus|COI-5P|MF832785	T
CNTIE105-15|Lejops chrysostomus|COI-5P|MF834139	T
CNTIF2412-15|Lejops chrysostomus|COI-5P|MF835449	T
CNTIF2413-15|Lejops chrysostomus|COI-5P|MF833561	T
CNTIF2432-15|Lejops chrysostomus|COI-5P|MF831558	T
CNTIF2600-15|Lejops chrysostomus|COI-5P|MF831467	T
JSDIR897-11|Lejops chrysostomus|COI-5P|KR654318	T
JSFLA010-08|Lejops willingi|COI-5P|KR661879	T
JSFLA036-08|Lejops willingi|COI-5P|KR672208	T
JWDCA478-10|Lejops willingi|COI-5P|HM860562	T
JWDCA492-10|Lejops willingi|COI-5P|HM860575	T
JWDCB019-10|Lejops curvipes|COI-5P|HM860988	T
JWDCC087-10|Lejops willingi|COI-5P|HQ962084	T
JWDCC278-10|Lejops willingi|COI-5P|HM861490	T
JWDCD067-10|Lejops willingi|COI-5P|HM862124	T
JWDCF132-10|Lejops willingi|COI-5P|KR662909	T
LRSYR059-07|Lejops curvipes|COI-5P|KR656251	T
LRSYR060-07|Lejops curvipes|COI-5P|KR665049	T
LRSYR061-07|Lejops curvipes|COI-5P|KR669733	T
MHSYR245-07|Lejops willingi|COI-5P	T
MHSYR246-07|Lejops willingi|COI-5P	T
MHSYR331-07|Lejops willingi|COI-5P	T
MHSYR340-07|Lejops willingi|COI-5P	T
MHSYR343-07|Lejops willingi|COI-5P	T
MHSYR344-07|Lejops willingi|COI-5P	T
MHSYR345-07|Lejops willingi|COI-5P	T
MHSYR346-07|Lejops willingi|COI-5P	T
MHSYR347-07|Lejops willingi|COI-5P	T
MHSYR348-07|Lejops willingi|COI-5P	T
MHSYR412-07|Lejops curvipes|COI-5P	T
OPPEE6448-17|Lejops chrysostomus|COI-5P	T
OPPEG2169-17|Lejops chrysostomus|COI-5P	T
TWDIP069-09|Lejops willingi|COI-5P|KR526165	T

## Sheet: Mesembrius BOLD Position 153
BOLD Sample	COI Position 153
GBMIN61897-17|Mesembrius cyanipennis|COI-5P|KR831046	S
GBMIN61898-17|Mesembrius cyanipennis|COI-5P|KR831049	S
GBMIN61899-17|Mesembrius cyanipennis|COI-5P|KR831048	S
GBMIN61900-17|Mesembrius cyanipennis|COI-5P|KR831052	S
GBMIN61901-17|Mesembrius cyanipennis|COI-5P|KR831047	S
GBMIN61902-17|Mesembrius cyanipennis|COI-5P|KR831051	S
GBMIN61903-17|Mesembrius cyanipennis|COI-5P|KR831045	S
GBMIN61904-17|Mesembrius ingratus|COI-5P|KR831056	S
GBMIN61905-17|Mesembrius ingratus|COI-5P|KR831054	S
GBMIN61906-17|Mesembrius ingratus|COI-5P|KR831058	S
GBMIN61907-17|Mesembrius ingratus|COI-5P|KR831057	S
GBMIN61908-17|Mesembrius ingratus|COI-5P|KR831053	S
GBMIN61909-17|Mesembrius ingratus|COI-5P|KR831059	S
GBMIN61910-17|Mesembrius ingratus|COI-5P|KR831055	S
GBMIN61911-17|Mesembrius lagopus|COI-5P|KR831071	S
GBMIN61912-17|Mesembrius lagopus|COI-5P|KR831064	S
GBMIN61913-17|Mesembrius lagopus|COI-5P|KR831074	S
GBMIN61914-17|Mesembrius lagopus|COI-5P|KR831069	S
GBMIN61915-17|Mesembrius lagopus|COI-5P|KR831067	S
GBMIN61916-17|Mesembrius lagopus|COI-5P|KR831068	S
GBMIN61917-17|Mesembrius lagopus|COI-5P|KR831075	S
GBMIN61918-17|Mesembrius lagopus|COI-5P|KR831062	S
GBMIN61919-17|Mesembrius lagopus|COI-5P|KR831065	S
GBMIN61920-17|Mesembrius lagopus|COI-5P|KR831073	S
GBMIN61921-17|Mesembrius lagopus|COI-5P|KR831060	S
GBMIN61922-17|Mesembrius lagopus|COI-5P|KR831066	S
GBMIN61923-17|Mesembrius minor|COI-5P|KR831076	S
GBMIN61924-17|Mesembrius nigriceps|COI-5P|KR831078	S
GBMIN61925-17|Mesembrius strigilatus|COI-5P|KR831081	S
GBMIN61926-17|Mesembrius strigilatus|COI-5P|KR831082	S
GBMIN61927-17|Mesembrius strigilatus|COI-5P|KR831085	S
GBMIN61928-17|Mesembrius strigilatus|COI-5P|KR831080	S
GBMIN61929-17|Mesembrius strigilatus|COI-5P|KR831084	S
GBMIN61930-17|Mesembrius tarsatus|COI-5P|KR831086	S
GBMIN61931-17|Mesembrius tarsatus|COI-5P|KR831090	S
GBMIN61932-17|Mesembrius tarsatus|COI-5P|KR831087	S
GBMIN61933-17|Mesembrius tarsatus|COI-5P|KR831089	S
GBMIN61934-17|Mesembrius tarsatus|COI-5P|KR831096	S
GBMIN61935-17|Mesembrius tarsatus|COI-5P|KR831088	S
GBMIN61936-17|Mesembrius tarsatus|COI-5P|KR831099	S
GBMIN61937-17|Mesembrius tarsatus|COI-5P|KR831101	S
GBMIN61938-17|Mesembrius tarsatus|COI-5P|KR831091	S
GBMIN61939-17|Mesembrius tarsatus|COI-5P|KR831098	S

## Sheet: Palpada BOLD Position 153
BOLD Sample	COI Position 153
ASIND1953-12|Palpada aemula|COI-5P	S
ASIND1954-12|Palpada aemula|COI-5P	S
ASIND1955-12|Palpada aemula|COI-5P	S
ASIND1956-12|Palpada aemula|COI-5P	S
ASIND1957-12|Palpada aemula|COI-5P	S
ASIND1959-12|Palpada agrorum|COI-5P	S
ASIND1960-12|Palpada agrorum|COI-5P	S
ASIND1961-12|Palpada agrorum|COI-5P	S
ASIND1962-12|Palpada agrorum|COI-5P	S
ASIND1963-12|Palpada agrorum|COI-5P	S
ASIND1964-12|Palpada agrorum|COI-5P	S
ASIND1965-12|Palpada albifrons|COI-5P	S
ASIND1966-12|Palpada albifrons|COI-5P	S
ASIND1969-12|Palpada albifrons|COI-5P	S
ASIND1970-12|Palpada aff. bistellata|COI-5P	S
ASIND1971-12|Palpada bistellata|COI-5P	S
ASIND1972-12|Palpada claripennis|COI-5P	S
ASIND1973-12|Palpada claripennis|COI-5P	S
ASIND1977-12|Palpada clarissima|COI-5P	S
ASIND1978-12|Palpada clarissima|COI-5P	S
ASIND1980-12|Palpada claudia|COI-5P	S
ASIND1983-12|Palpada claudia|COI-5P	S
ASIND1984-12|Palpada conica|COI-5P	S
ASIND1985-12|Palpada conica|COI-5P	S
ASIND1986-12|Palpada conica|COI-5P	S
ASIND1988-12|Palpada conica|COI-5P	S
ASIND1989-12|Palpada CR-B|COI-5P	S
ASIND1990-12|Palpada CR-B|COI-5P	S
ASIND1991-12|Palpada CR-B|COI-5P	S
ASIND1992-12|Palpada CR-B|COI-5P	S
ASIND1993-12|Palpada CR-B|COI-5P	S
ASIND1995-12|Palpada CR-B|COI-5P	S
ASIND1996-12|Palpada CR-A|COI-5P	S
ASIND1998-12|Palpada CR-A|COI-5P	S
ASIND2002-12|Palpada CR-C|COI-5P	S
ASIND2004-12|Palpada CR-D|COI-5P	S
ASIND2006-12|Palpada CR-D|COI-5P	S
ASIND2008-12|Palpada CR-D|COI-5P	S
ASIND2009-12|Palpada CR-E|COI-5P	S
ASIND2010-12|Palpada CR-E|COI-5P	S
ASIND2012-12|Palpada CR-M|COI-5P	S
ASIND2014-12|Palpada CR-M|COI-5P	S
ASIND2015-12|Palpada CR-M|COI-5P	S
ASIND2016-12|Palpada erratica|COI-5P	S
ASIND2017-12|Palpada erratica|COI-5P	S
ASIND2018-12|Palpada erratica|COI-5P	S
ASIND2019-12|Palpada erratica|COI-5P	S
ASIND2021-12|Palpada expicta|COI-5P	S
ASIND2022-12|Palpada expicta|COI-5P	S
ASIND2023-12|Palpada expicta|COI-5P	S
ASIND2024-12|Palpada expicta|COI-5P	S
ASIND2025-12|Palpada expicta|COI-5P	S
ASIND2027-12|Palpada familiaris|COI-5P	S
ASIND2029-12|Palpada familiaris|COI-5P	S
ASIND2030-12|Palpada familiaris|COI-5P	S
ASIND2031-12|Palpada fasciata|COI-5P	S
ASIND2032-12|Palpada fasciata|COI-5P	S
ASIND2033-12|Palpada fasciata|COI-5P	S
ASIND2034-12|Palpada fasciata|COI-5P	S
ASIND2035-12|Palpada fasciata|COI-5P	S
ASIND2036-12|Palpada fasciata|COI-5P	S
ASIND2037-12|Palpada flavoscutellata|COI-5P	S
ASIND2038-12|Palpada flavoscutellata|COI-5P	S
ASIND2040-12|Palpada flavoscutellata|COI-5P	S
ASIND2041-12|Palpada flavoscutellata|COI-5P	S
ASIND2042-12|Palpada aff. florea|COI-5P	S
ASIND2043-12|Palpada aff. florea|COI-5P	S
ASIND2045-12|Palpada aff. florea|COI-5P	S
ASIND2046-12|Palpada aff. florea|COI-5P	S
ASIND2047-12|Palpada florea|COI-5P	S
ASIND2048-12|Palpada florea|COI-5P	S
ASIND2049-12|Palpada florea|COI-5P	S
ASIND2050-12|Palpada florea|COI-5P	S
ASIND2052-12|Palpada fuliginosa|COI-5P	S
ASIND2053-12|Palpada fuliginosa|COI-5P	S
ASIND2054-12|Palpada fuliginosa|COI-5P	S
ASIND2055-12|Palpada fuliginosa|COI-5P	S
ASIND2056-12|Palpada fuliginosa|COI-5P	S
ASIND2057-12|Palpada furcatus|COI-5P	S
ASIND2058-12|Palpada furcatus|COI-5P	S
ASIND2059-12|Palpada furcatus|COI-5P	S
ASIND2061-12|Palpada furcatus|COI-5P	S
ASIND2062-12|Palpada furcatus|COI-5P	S
ASIND2063-12|Palpada intermedia|COI-5P	S
ASIND2064-12|Palpada intermedia|COI-5P	S
ASIND2065-12|Palpada intermedia|COI-5P	S
ASIND2066-12|Palpada intermedia|COI-5P	S
ASIND2067-12|Palpada intermedia|COI-5P	S
ASIND2068-12|Palpada interrupta|COI-5P	S
ASIND2069-12|Palpada mexicana|COI-5P	S
ASIND2070-12|Palpada mexicana|COI-5P	S
ASIND2071-12|Palpada mexicana|COI-5P	S
ASIND2072-12|Palpada mexicana|COI-5P	S
ASIND2073-12|Palpada mexicana|COI-5P	S
ASIND2074-12|Palpada mexicana|COI-5P	S
ASIND2075-12|Palpada mitis|COI-5P	S
ASIND2078-12|Palpada mitis|COI-5P	S
ASIND2080-12|Palpada ochracea|COI-5P	S
ASIND2081-12|Palpada ochracea|COI-5P	S
ASIND2084-12|Palpada ochracea|COI-5P	S
ASIND2087-12|Palpada parvula|COI-5P	S
ASIND2088-12|Palpada parvula|COI-5P	S
ASIND2089-12|Palpada parvula|COI-5P	S
ASIND2092-12|Palpada pusillus|COI-5P	S
ASIND2095-12|Palpada pusillus|COI-5P	S
ASIND2096-12|Palpada rufiventris|COI-5P	S
ASIND2097-12|Palpada rufiventris|COI-5P	S
ASIND2098-12|Palpada rufiventris|COI-5P	S
ASIND2100-12|Palpada rufiventris|COI-5P	S
ASIND2102-12|Palpada scutellaris|COI-5P	S
ASIND2103-12|Palpada scutellaris|COI-5P	S
ASIND2104-12|Palpada scutellaris|COI-5P	S
ASIND2107-12|Palpada semicircula|COI-5P	S
ASIND2109-12|Palpada semicircula|COI-5P	S
ASIND2110-12|Palpada vierecki|COI-5P	S
ASIND2111-12|Palpada vierecki|COI-5P	S
ASIND2112-12|Palpada vierecki|COI-5P	S
ASIND2113-12|Palpada vierecki|COI-5P	S
ASIND2114-12|Palpada vierecki|COI-5P	S
ASIND2115-12|Palpada vinetorum|COI-5P	S
ASIND2116-12|Palpada vinetorum|COI-5P	S
ASIND2117-12|Palpada vinetorum|COI-5P	S
ASIND2118-12|Palpada vinetorum|COI-5P	S
ASIND2119-12|Palpada vinetorum|COI-5P	S
ASIND2121-12|Palpada 93 8|COI-5P	S
ASIND2347-12|Palpada familiaris|COI-5P	S
ASIND2348-12|Palpada scutellaris|COI-5P	S
ASIND2349-12|Palpada scutellaris|COI-5P	S
ASIND2351-12|Palpada agrorum|COI-5P	S
ASIND2352-12|Palpada florea|COI-5P	S
ASIND2353-12|Palpada aemula|COI-5P	S
ASIND2354-12|Palpada conica|COI-5P	S
ASIND2355-12|Palpada conica|COI-5P	S
ASIND2356-12|Palpada CR-D|COI-5P	S
ASIND2357-12|Palpada CR-D|COI-5P	S
ASIND2358-12|Palpada CR-D|COI-5P	S
ASIND2441-12|Palpada 93-8|COI-5P	S
ASIND2442-12|Palpada 93-8|COI-5P	S
ASIND2443-12|Palpada intermedia|COI-5P	S
ASIND2444-12|Palpada intermedia|COI-5P	S
ASIND2445-12|Palpada intermedia|COI-5P	S
ASIND2446-12|Palpada intermedia|COI-5P	S
ASIND2448-12|Palpada mexicana|COI-5P	S
ASIND2449-12|Palpada mexicana|COI-5P	S
ASIND2450-12|Palpada mexicana|COI-5P	S
ASIND2451-12|Palpada mexicana|COI-5P	S
ASIND2452-12|Palpada mexicana|COI-5P	S
ASIND2485-12|Palpada familiaris|COI-5P	S
ASIND2487-12|Palpada familiaris|COI-5P	S
ASIND2488-12|Palpada CR-C|COI-5P	S
ASIND2489-12|Palpada CR-C|COI-5P	S
ASIND2490-12|Palpada CR-C|COI-5P	S
ASIND2491-12|Palpada CR-C|COI-5P	S
ASIND2492-12|Palpada CR-C|COI-5P	S
ASIND2493-12|Palpada vinetorum|COI-5P	S
ASIND2495-12|Palpada scutellaris|COI-5P	S
ASIND2496-12|Palpada scutellaris|COI-5P	S
ASIND2497-12|Palpada scutellaris|COI-5P	S
ASIND2498-12|Palpada scutellaris|COI-5P	S
ASIND2499-12|Palpada scutellaris|COI-5P	S
ASIND2500-12|Palpada expicta|COI-5P	S
ASIND2502-12|Palpada aff. florea|COI-5P	S
ASIND2503-12|Palpada aff. florea|COI-5P	S
ASIND2504-12|Palpada fasciata|COI-5P	S
ASIND2505-12|Palpada fasciata|COI-5P	S
ASIND2506-12|Palpada aemula|COI-5P	S
ASIND2507-12|Palpada aemula|COI-5P	S
ASIND2509-12|Palpada aemula|COI-5P	S
ASIND2510-12|Palpada aemula|COI-5P	S
ASIND2511-12|Palpada furcatus|COI-5P	S
ASIND2512-12|Palpada furcatus|COI-5P	S
ASIND2513-12|Palpada furcatus|COI-5P	S
ASIND2514-12|Palpada furcatus|COI-5P	S
ASIND2515-12|Palpada furcatus|COI-5P	S
ASIND2806-12|Palpada semicircula|COI-5P	S
ASIND2807-12|Palpada semicircula|COI-5P	S
ASIND2808-12|Palpada mexicana|COI-5P	S
ASIND2809-12|Palpada florea|COI-5P	S
ASIND2810-12|Palpada florea|COI-5P	S
ASIND2811-12|Palpada erratica|COI-5P	S
ASIND2813-12|Palpada CR-D|COI-5P	S
ASIND2814-12|Palpada CR-D|COI-5P	S
ASIND2815-12|Palpada CR-D|COI-5P	S
BBDIT266-11|Palpada pusillus|COI-5P	S
BBDIT290-11|Palpada furcatus|COI-5P	S
GBDP6175-09|Palpada prietorum|COI-5P|EF127452	S
GBDP6176-09|Palpada ruficeps|COI-5P|EF127451	S
GBSYR020-10|Palpada mexicana|COI-5P|EU431490	S
SYC2574-14|Palpada vinetorum|COI-5P|KX054301	S
SYC2867-14|Palpada vinetorum|COI-5P|KX054303	S
SYC5397-14|Palpada vinetorum|COI-5P|KX054299	S
SYC5403-14|Palpada vinetorum|COI-5P|KX054302	S
SYC5438-14|Palpada vinetorum|COI-5P|KX054298	S
SYC9601-14|Palpada vinetorum|COI-5P|KX054300	S
SYC9602-14|Palpada vinetorum|COI-5P|KX054304	S

## Sheet: Parhelophilus BOLD Position 153
BOLD Sample	COI Position 153
BBDCN007-10|Parhelophilus laetus|COI-5P|JF867596	S
BEEEE410-16|Parhelophilus versicolor|COI-5P	S
CNFNR4435-14|Parhelophilus porcus|COI-5P|KR389301	S
CNPPB130-12|Parhelophilus laetus|COI-5P|KJ087333	S
CNPPB1762-12|Parhelophilus laetus|COI-5P|MG165980	S
CNPPC065-12|Parhelophilus laetus|COI-5P|KJ090573	S
CNPPC082-12|Parhelophilus laetus|COI-5P|KJ090968	S
CNPPC094-12|Parhelophilus laetus|COI-5P|KJ163270	S
CNPPC104-12|Parhelophilus laetus|COI-5P|KJ093058	S
CNPPC1118-12|Parhelophilus laetus|COI-5P|MG165822	S
CNPPC1120-12|Parhelophilus laetus|COI-5P|KJ085263	S
CNPPD1268-12|Parhelophilus laetus|COI-5P|KJ092085	S
CNPPE2230-12|Parhelophilus laetus|COI-5P|KJ087581	S
CNTIB234-15|Parhelophilus laetus|COI-5P|MF837495	S
CNTIC3989-15|Parhelophilus laetus|COI-5P|MF835145	S
CNTIC4015-15|Parhelophilus laetus|COI-5P|MF832799	S
CNTIC4016-15|Parhelophilus laetus|COI-5P|MF832067	S
CNTIC4033-15|Parhelophilus laetus|COI-5P|MF836070	S
CNTID3928-15|Parhelophilus laetus|COI-5P|MF836008	S
JSDIQ812-10|Parhelophilus rex|COI-5P|JN302496	S
JSDIR754-11|Parhelophilus laetus|COI-5P|KR661921	S
JSDIR759-11|Parhelophilus laetus|COI-5P|KR656979	S
JWDCA494-10|Parhelophilus porcus|COI-5P|HM860577	S
JWDCF839-10|Parhelophilus porcus|COI-5P|JF875605	S
JWDCF840-10|Parhelophilus porcus|COI-5P|JF875606	S
JWDCG789-10|Parhelophilus obsoletus|COI-5P|JF876310	S
JWDCH202-10|Parhelophilus obsoletus|COI-5P|JF876568	S
JWDCH204-10|Parhelophilus obsoletus|COI-5P|JF876570	S
JWDCH646-10|Parhelophilus porcus|COI-5P|JF876877	S
JWDCI461-10|Parhelophilus obsoletus|COI-5P|KR665646	S
JWDCI610-10|Parhelophilus obsoletus|COI-5P|JF877532	S
JWDCI884-11|Parhelophilus obsoletus|COI-5P|JF877609	S
JWDCK241-11|Parhelophilus porcus|COI-5P|JF878168	S
JWDCL322-11|Parhelophilus porcus|COI-5P|JF878237	S
LRSYR011-07|Parhelophilus obsoletus|COI-5P|KR669728	S
LRSYR023-07|Parhelophilus porcus|COI-5P|KR654082	S
LRSYR057-07|Parhelophilus obsoletus|COI-5P|KR653740	S
MHSYR264-07|Parhelophilus obsoletus|COI-5P	S
MHSYR265-07|Parhelophilus obsoletus|COI-5P	S
MHSYR266-07|Parhelophilus obsoletus|COI-5P	S
MHSYR267-07|Parhelophilus obsoletus|COI-5P	S
MHSYR268-07|Parhelophilus obsoletus|COI-5P	S
MHSYR269-07|Parhelophilus obsoletus|COI-5P	S
MHSYR270-07|Parhelophilus obsoletus|COI-5P	S
MHSYR271-07|Parhelophilus obsoletus|COI-5P	S
MHSYR272-07|Parhelophilus obsoletus|COI-5P	S
MHSYR273-07|Parhelophilus obsoletus|COI-5P	S
MHSYR274-07|Parhelophilus porcus|COI-5P	S
MHSYR275-07|Parhelophilus porcus|COI-5P	S
MHSYR276-07|Parhelophilus porcus|COI-5P	S
MHSYR277-07|Parhelophilus porcus|COI-5P	S
MHSYR278-07|Parhelophilus porcus|COI-5P	S
MHSYR279-07|Parhelophilus porcus|COI-5P	S
MHSYR280-07|Parhelophilus porcus|COI-5P	S
MHSYR281-07|Parhelophilus porcus|COI-5P	S
MHSYR282-07|Parhelophilus porcus|COI-5P	S
MHSYR283-07|Parhelophilus porcus|COI-5P	S
NORSY446-15|Parhelophilus consimilis|COI-5P	S
NORSY447-15|Parhelophilus versicolor|COI-5P	S
NORSY448-15|Parhelophilus versicolor|COI-5P	S
NORSY449-15|Parhelophilus versicolor|COI-5P	S
SONA239-07|Parhelophilus obsoletus|COI-5P	S
SONA241-07|Parhelophilus obsoletus|COI-5P	S
SONA243-07|Parhelophilus obsoletus|COI-5P	S
SONA244-07|Parhelophilus porcus|COI-5P	S
SONA247-07|Parhelophilus porcus|COI-5P	S
SONA248-07|Parhelophilus porcus|COI-5P	S
SONA405-09|Parhelophilus rex|COI-5P	S
SSKJC648-15|Parhelophilus obsoletus|COI-5P|MF832730	S
SSKUB9276-15|Parhelophilus obsoletus|COI-5P|MF832221	S
SSPAA2655-13|Parhelophilus obsoletus|COI-5P|KM903474	S
SSPAC6960-13|Parhelophilus obsoletus|COI-5P|KM624929	S

[truncated: 4 more sheets: Phytomia BOLD Position 153, Senaspis BOLD Position 153, Mallota BOLD Position 153, Chasmomma BOLD Position 153]
